# Supplementary material
Source: Elsevier journal article supplement (https://authors.library.caltech.edu/76593/2/mmc2.xlsx)
Supplement: mmc2 [file mmc2.xlsx]

## Sheet: Community
Community I
Mostly located in the cytoplasm
Community I, A
Located in the cytoplasm, mostly Golgi apparatus and vacuoles
Vesicular trafficking from Golgi and ER, autophagy and proteasome, and contain starvation detection module encoded by AMPK Snf1
ADA2	Nucleus. Transcription coactivator; component of the ADA and SAGA transcriptional adaptor/HAT (histone acetyltransferase) complexes
ADK1	Nucleus and cytoplasm. Adenylate kinase, required for purine metabolism; localized to the cytoplasm and the mitochondria; lacks cleavable signal sequence; protein abundance increases in response to DNA replication stress
AKR1	Cytoplasm (Golgi apparatus and endosome). Palmitoyl transferase involved in protein palmitoylation; acts as a negative regulator of pheromone response pathway; required for endocytosis of pheromone receptors; involved in cell shape control; contains ankyrin repeatsNucleus. Transcription coactivator; component of the ADA and SAGA transcriptional adaptor/HAT (histone acetyltransferase) complexes
APN1	Nucleus and mitochondria. Major apurinic/apyrimidinic endonuclease; 3'-repair diesterase; involved in repair of DNA damage by oxidation and alkylating agents; also functions as a 3'-5' exonuclease to repair 7,8-dihydro-8-oxodeoxyguanosine; genetically interacts with NTG1 to maintain mitochondrial genome integrity
ARF1	Cytoplasm (Golgi apparatus). ADP-ribosylation factor; GTPase of the Ras superfamily involved in regulation of coated vesicle formation in intracellular trafficking within the Golgi; ARF1 has a paralog, ARF2, that arose from the whole genome duplication
ATG1	Cytoplasm (vacuole). Protein serine/threonine kinase; required for vesicle formation in autophagy and the cytoplasm-to-vacuole targeting (Cvt) pathway; structurally required for phagophore assembly site formation; during autophagy forms a complex with Atg13p and Atg17p
ATG10	Cytoplasm (vacuole). Conserved E2-like conjugating enzyme; mediates formation of the Atg12p-Atg5p conjugate, which is a critical step in autophagy
ATG11	Cytoplasm (vacuole). Adapter protein for pexophagy and the Cvt targeting pathway; directs receptor-bound cargo to the phagophore assembly site (PAS) for packaging into vesicles; required for recruiting other proteins to the PAS; recruits Dnm1p to facilitate fission of mitochondria that are destined for removal by mitophagy
ATG12	Cytoplasm (vacuole). Ubiquitin-like modifier involved in autophagy and the Cvt pathway; conserved; conjugated to Atg5p to form a complex involved in Atg8p lipidation; Atg5p-Atg12p cojugate also forms a complex with Atg16p; the Atg5-Atg12/Atg16 complex binds to membranes and is essential for autophagosome formation
ATG13	Cytoplasm (vacuole). Regulatory subunit of the Atg1p signaling complex; stimulates Atg1p kinase activity; required for vesicle formation during autophagy and the cytoplasm-to-vacuole targeting (Cvt) pathway; contains a HORMA domain required for autophagy and for recruitment of the phosphatidylinositol 3-kinase complex subunit Atg14p to the pre-autophagosomal structure
ATG16	Cytoplasm (vacuole). Conserved protein involved in autophagy; interacts with Atg12p-Atg5p conjugates to form Atg12p-Atg5p-Atg16p multimers, which binds to membranes and localizes to the pre-autophagosomal structure and are required for autophagy; relocalizes from nucleus to cytoplasmic foci upon DNA replication stress
ATG17	Cytoplasm (vacuole). Scaffold protein responsible for phagophore assembly site organization; regulatory subunit of an autophagy-specific complex that includes Atg1p and Atg13p; stimulates Atg1p kinase activity
ATG18	Cytoplasm (vacuole). Phosphoinositide binding protein; required for vesicle formation in autophagy and the cytoplasm-to-vacuole targeting (Cvt) pathway; binds both phosphatidylinositol (3,5)-bisphosphate and phosphatidylinositol 3-phosphate; WD-40 repeat protein; relocalizes from vacuole to cytoplasm upon DNA replication stress; has 4 mammalian homologs WIPI1, WIPI2, WIPI3 and WIPI4/WDR45
ATG2	Cytoplasm (vacuole). Peripheral membrane protein required for autophagic vesicle formation; also required for vesicle formation during pexophagy and the cytoplasm-to-vaucole targeting (Cvt) pathway; involved in Atg9p cycling between the phagophore assembly site and mitochondria; essential for cell cycle progression from G2/M to G1 under nitrogen starvation
ATG23	Cytoplasm (vacuole). Peripheral membrane protein required for autophagy and CVT; required for cytoplasm-to-vacuole targeting (Cvt) pathway and efficient macroautophagy; cycles between the phagophore assembly site (PAS) and non-PAS locations; forms a complex with Atg9p and Atg27p
ATG27	Cytoplasm (vacuole). Type I membrane protein involved in autophagy and the Cvt pathway; may be involved in membrane delivery to the phagophore assembly site
ATG3	Cytoplasm (vacuole). E2-like enzyme; involved in autophagy and the cytoplasm-to-vacuole targeting (Cvt) pathway; plays a role in formation of Atg8p-phosphatidylethanolamine conjugates, which are involved in membrane dynamics during autophagy and Cvt; interaction with Atg8p is regulated by its acetylation by Esa1p (catalytic subunit of NuA4 histone acetyltransferase complex) while attenuation of A…
ATG32	Cytoplasm (vacuole) and mitochondria. Mitochondrial outer membrane protein required to initiate mitophagy; recruits the autophagy adaptor protein Atg11p and the ubiquitin-like protein Atg8p to the mitochondrial surface to initiate mitophagy, the selective vacuolar degradation of mitochondria in response to starvation; can promote pexophagy when placed ectopically in the peroxisomal membrane; regu…
ATG34	Cytoplasm (vacuole). Conserved cysteine protease required for autophagy; cleaves Atg8p to a form required for autophagosome and Cvt vesicle generation
ATG4	Cytoplasm (vacuole). Conserved cysteine protease required for autophagy; cleaves Atg8p to a form required for autophagosome and Cvt vesicle generation
ATG5	Cytoplasm (vacuole). Receptor protein involved in selective autophagy during starvation; specifically involved in the transport of cargo protein alpha-mannosidase (Ams1p); Atg19p paralog
ATG7	Cytoplasm (vacuole). Autophagy-related protein and dual specificity member of the E1 family; mediates the attachment of Atg12p to Atg5p and Atg8p to phosphatidylethanolamine which are required steps in autophagosome formation; E1 enzymes are also known as ubiquitin-activating enzymes; involved in methionine restriction extension of chronological lifespan in an autophagy-dependent manner
ATG8	Cytoplasm (vacuole). Component of autophagosomes and Cvt vesicles; regulator of Atg1p, targets it to autophagosomes; binds the Atg1p-Atg13p complex, triggering its vacuolar degradation; unique ubiquitin-like protein whose conjugation target is lipid phosphatidylethanolamine (PE); Atg8p-PE is anchored to membranes, is involved in phagophore expansion, and may mediate membrane fusion during autopha…
ATG9	Cytoplasm (vacuole). Transmembrane protein involved in forming Cvt and autophagic vesicles; cycles between the phagophore assembly site (PAS) and other cytosolic punctate structures, not found in autophagosomes; may be involved in membrane delivery to the PAS
BCK1	Cytoplasm. MAPKKK acting in the protein kinase C signaling pathway; the kinase C signaling pathway controls cell integrity; upon activation by Pkc1p phosphorylates downstream kinases Mkk1p and Mkk2p
BUL1	Cytoplasm. Ubiquitin-binding component of the Rsp5p E3-ubiquitin ligase complex; disruption causes temperature-sensitive growth, overexpression causes missorting of amino acid permeases
CEM1	Mitochondria. Mitochondrial beta-keto-acyl synthase; possible role in fatty acid synthesis; required for mitochondrial respiration
COQ2	Mitochondria. Para hydroxybenzoate polyprenyl transferase; catalyzes the second step in ubiquinone (coenzyme Q) biosynthesis
COX19	Mitochondria. Protein required for cytochrome c oxidase assembly; located in the cytosol and mitochondrial intermembrane space; putative copper metallochaperone that delivers copper to cytochrome c oxidase; contains twin cysteine-x9-cysteine motifs
CTR1	Mitochondria. High-affinity copper transporter of the plasma membrane; mediates nearly all copper uptake under low copper conditions; transcriptionally induced at low copper levels and degraded at high copper levels; protein increases in abundance and relocalizes from nucleus to plasma membrane upon DNA replication stress
DHH1	Mitochondria. Cytoplasmic DExD/H-box helicase, stimulates mRNA decapping; coordinates distinct steps in mRNA function and decay, interacts with both the decapping and deadenylase complexes, role in translational repression, mRNA decay, and processing body dynamics; may have a role in mRNA export; C-terminus of Dhh1p interacts with Ngr1p and promotes POR1, but not EDC1 mRNA decay; forms cytoplasmi…
DSL1	Cytoplasm (ER and Golgi apparatus). Peripheral membrane protein needed for Golgi-to-ER retrograde traffic; forms a complex with Sec39p and Tip20p that interacts with ER SNAREs Sec20p and Use1p
EGD1	Nucleus and cytoplasm. Subunit beta1 of the nascent polypeptide-associated complex (NAC); involved in protein targeting, associated with cytoplasmic ribosomes
GCN5	Nucleus. Catalytic subunit of ADA and SAGA histone acetyltransferase complexes; modifies N-terminal lysines on histones H2B and H3; acetylates Rsc4p, a subunit of the RSC chromatin-remodeling complex, altering replication stress tolerance; relocalizes to the cytosol in response to hypoxia
GEF1	Cytoplasm (Golgi apparatus). Voltage-gated chloride channel; localized to the golgi, the endosomal system, and plasma membrane; involved in cation homeostasis; highly homologous to vertebrate voltage-gated chloride channels
GLO3	Cytoplasm (ER and Golgi apparatus). ADP-ribosylation factor GTPase activating protein (ARF GAP); involved in ER-Golgi transport
GVP36	Cytoplasm (Golgi apparatus). BAR domain protein that localizes to early and late Golgi vesicles; required for adaptation to varying nutrient concentrations, fluid-phase endocytosis, polarization of the actin cytoskeleton, and vacuole biogenesis
HEK2	Cytoplasm RNA binding protein involved in asymmetric localization of ASH1 mRNA; represses translation of ASH1 mRNA, an effect reversed by Yck1p-dependent phosphoryation
ISA1	Mitochondria. Protein required for maturation of mitochondrial [4Fe-4S] proteins; functions in a complex with Isa2p and possibly Iba57p; isa1 deletion causes loss of mitochondrial DNA and respiratory deficiency; depletion reduces growth on nonfermentable carbon sources
LCB5	Cytoplasm (Golgi apparatus). Minor sphingoid long-chain base kinase; possibly involved in synthesis of long-chain base phosphates, which function as signaling molecules
LDB17	Cytoplasm. Protein involved in the regulation of endocytosis; transiently recruited to actin cortical patches in a SLA1-dependent manner after late coat component assembly; GFP-fusion protein localizes to the periphery, cytoplasm, bud, and bud neck
MSS4	Cytoplasm. Phosphatidylinositol-4-phosphate 5-kinase; involved in actin cytoskeleton organization and cell morphogenesis
MTG2	Mitochondria. Putative GTPase; member of the Obg family; peripheral protein of the mitochondrial inner membrane that associates with the large ribosomal subunit; required for mitochondrial translation, possibly via a role in ribosome assembly
NFU1	Mitochondria. Protein involved in iron metabolism in mitochondria
PEP12	Cytoplasm (Golgi apparatus and vacuole). Target membrane receptor (t-SNARE); for vesicular intermediates traveling between the Golgi apparatus and the vacuole; controls entry of biosynthetic, endocytic, and retrograde traffic into the prevacuolar compartment
PEP7	Cytoplasm (Golgi apparatus and vacuole). Adaptor protein involved in vesicle-mediated vacuolar protein sorting; multivalent adaptor protein; facilitates vesicle-mediated vacuolar protein sorting by ensuring high-fidelity vesicle docking and fusion, which are essential for targeting of vesicles to the endosome
PGA2	Cytoplasm (ER and vacuole). Essential protein required for maturation of Gas1p and Pho8p; involved in protein trafficking; GFP-fusion protein localizes to the ER and YFP-fusion protein to the nuclear envelope-ER network
PHO85	Nucleus and cytoplasm. Cyclin-dependent kinase; has ten cyclin partners; involved in regulating the cellular response to nutrient levels and environmental conditions and progression through the cell cycle
PLC1	Nucleus and cytoplasm. Phospholipase C; hydrolyzes phosphatidylinositol 4,5-biphosphate (PIP2) to generate the signaling molecules inositol 1,4,5-triphosphate (IP3) and 1,2-diacylglycerol (DAG); involved in regulating many cellular processes; Plc1p and inositol polyphosphates are required for acetyl-CoA homeostasis which regulates global histone acetylation. it also need for autophagy
PRE1	Nucleus and cytoplasm. Beta 4 subunit of the 20S proteasome; localizes to the nucleus throughout the cell cycle
PRE3	Nucleus and cytoplasm. Beta 1 subunit of the 20S proteasome; responsible for cleavage after acidic residues in peptides
PRE5	Nucleus and cytoplasm. Alpha 6 subunit of the 20S proteasome; protein abundance increases in response to DNA replication stress
PRE6	Nucleus and cytoplasm. Alpha 4 subunit of the 20S proteasome; may replace alpha 3 subunit (Pre9p) under stress conditions to create a more active proteasomal isoform; GFP-fusion protein relocates from cytosol to the mitochondrial surface upon oxidative stress
PRE6	Nucleus and cytoplasm. Alpha 4 subunit of the 20S proteasome; may replace alpha 3 subunit (Pre9p) under stress conditions to create a more active proteasomal isoform; GFP-fusion protein relocates from cytosol to the mitochondrial surface upon oxidative stress
RDR1	Nucleus. Transcriptional repressor involved in regulating multidrug resistance; negatively regulates expression of the PDR5 gene; member of the Gal4p family of zinc cluster proteins
RET2	Cytoplasm (ER and Golgi apparatus). Delta subunit of the coatomer complex (COPI); COPI coats Golgi-derived transport vesicles; involved in retrograde transport between Golgi and ER
RPN8	Nucleus and cytoplasm Essential non-ATPase regulatory subunit of the 26S proteasome; has similarity to the human p40 proteasomal subunit and to another S. cerevisiae regulatory subunit, Rpn11p
RPS26B	Cytosolic small ribosomal unite. Protein component of the small (40S) ribosomal subunit
RPT2	Nucleus and cytoplasm. Proteasome regulatory particle base subunit RPT2
RPT4	Nucleus and cytoplasm. ATPase of the 19S regulatory particle of the 26S proteasome; one of six ATPases of the regulatory particle; involved in degradation of ubiquitinated substrates; contributes preferentially to ERAD; required for spindle pole body duplication
RTF1	Nucleus. Subunit of RNAPII-associated chromatin remodeling Paf1 complex; regulates gene expression by directing cotranscriptional histone modification, influences transcription and chromatin structure through several independent functional domains; directly or indirectly regulates DNA-binding properties of Spt15p and relative activities of different TATA elements; involved in transcription elonga…
SAC1	Mitochondria and cytoplasm (ER and Golgi apparatus). Phosphatidylinositol phosphate (PtdInsP) phosphatase; involved in hydrolysis of PtdIns[4]P in the early and medial Golgi; regulated by interaction with Vps74p; ER localized transmembrane protein which cycles through the Golgi; involved in protein trafficking and processing, secretion, and cell wall maintenance; regulates sphingolipid biosynthes…
SEC16	Cytoplasm (ER and Golgi apparatus). COPII vesicle coat protein required for ER transport vesicle budding
SEC17	Cytoplasm (ER, Golgi apparatus, and vacuoles). Alpha-SNAP cochaperone; SNARE-complex adaptor for Sec18 (NSF) during the disassembly of postfusion cis-SNARE complexes; stimulates the ATPase activity of Sec18p; peripheral membrane protein required for vesicular transport between ER and Golgi, the 'priming' step in homotypic vacuole fusion, and autophagy; similar to mammalian alpha-SNAP
SEC18	Cytoplasm (ER, vacuoles, and Golgi apparatus). AAA ATPase and SNARE disassembly chaperone; required for vesicular transport between ER and Golg
SEC2	Cytoplasm (ER, vacuoles, and Golgi apparatus). Guanyl-nucleotide exchange factor for the small G-protein Sec4p; essential for post-Golgi vesicle transport and for autophagy
SEC21	Cytoplasm (ER, Golgi apparatus, and vacuoles). Gamma subunit of coatomer; coatomer is a heptameric protein complex that together with Arf1p forms the COPI coat; involved in ER to Golgi transport of selective cargo
SEC27	Cytoplasm (ER, Golgi apparatus, and vacuoles). Essential beta'-coat protein of the COPI coatomer; involved in ER-to-Golgi and Golgi-to-ER transport; contains WD40 domains that mediate cargo selective interactions
SEC4	Cytoplasm (ER, Golgi apparatus, and vacuoles). Rab family GTPase; essential for vesicle-mediated exocytic secretion and autophagy; associates with the exocyst component Sec15p and may regulate polarized delivery of transport vesicles to the exocyst at the plasma membrane
SED5	Cytoplasm (ER, Golgi apparatus, and vacuoles). cis-Golgi t-SNARE syntaxin; required for vesicular transport between the ER and the Golgi complex; binds at least 9 SNARE proteins
SHP1	Cytoplasm (ER). UBX (ubiquitin regulatory X) domain-containing protein; regulates Glc7p phosphatase activity; shp1 mutants are impaired in growth and mitotic progression; functions in growth and mitotic progression require Cdc48p binding; mitotic phenotype is caused by reduced Glc7p activity; interacts with ubiquitylated proteins, required for degradation of a ubiquitylated model substrate
SLA1	Cytoplasm. Cytoskeletal protein binding protein; required for assembly of the cortical actin cytoskeleton; interacts with proteins regulating actin dynamics and proteins required for endocytosis
SLY1	Cytoplasm (ER, Golgi apparatus, and vacuoles). Hydrophilic protein involved in ER/Golgi vesicle trafficking; SM (Sec1/Munc-18) family protein that binds the tSNARE Sed5p and stimulates its assembly into a trans-SNARE membrane-protein complex
SNF7	Cytoplasm, One of four subunits of the ESCRT-III complex; involved in the sorting of transmembrane proteins into the multivesicular body (MVB) pathway
SOD1	Mitochondria and cytoplasm, cytosolic copper-zinc superoxide dismutase; detoxifies superoxide
SRB2	Nucleus. Subunit of the RNA polymerase II mediator complex; associates with core polymerase subunits to form the RNA polymerase II holoenzyme; general transcription factor involved in telomere maintenance
SRB6	Subunit of the RNA polymerase II mediator complex; associates with core polymerase subunits to form the RNA polymerase II holoenzyme; general transcription factor involved in telomere maintenance
SYG1	Cytoplasm and mitochondria. Plasma membrane hypothetical protein; truncation and overexpression suppresses lethality of G-alpha protein deficiency
TEF4	Cytoplasm. Gamma subunit of translational elongation factor eEF1B; stimulates the binding of aminoacyl-tRNA (AA-tRNA) to ribosomes by releasing eEF1A (Tef1p/Tef2p) from the ribosomal complex
THR4	Nucleus and cytoplasm. Threonine synthase; conserved protein that catalyzes formation of threonine from O-phosphohomoserine; expression is regulated by the GCN4-mediated general amino acid control pathway
TRS20	Cytoplasm (Golgi apparatus). Core component of transport protein particle (TRAPP) complexes I-III
Ubc4	Nucleus and cytoplasm. Ubiquitin-conjugating enzyme (E2); key E2 partner with Ubc1p for the anaphase-promoting complex (APC); mediates degradation of abnormal or excess proteins, including calmodulin and histone H3; regulates levels of DNA Polymerase-{alpha} to promote efficient and accurate DNA replication; interacts with many SCF ubiquitin protein ligases; component of the cellular stress respo…
VID31	Nucleus and cytoplasm. RNAPII degradation factor; forms a complex with Rad26p in chromatin, enables ubiquitination and proteolysis of RNAPII present in an elongation complex; mutant is deficient in Zip1p loading onto chromosomes during meiosis
VPS16	Cytoplasm (Golgi apparatus). Subunit of the HOPS and the CORVET complexes
VPS45	Cytoplasm (ER, Golgi apparatus, vacuole). Protein of the Sec1p/Munc-18 family; essential for vacuolar protein sorting; required for the function of Pep12p and the early endosome/late Golgi SNARE Tlg2p; essential for fusion of Golgi-derived vesicles with the prevacuolar compartment
VPS51	Cytoplasm (Golgi apparatus). Component of the GARP (Golgi-associated retrograde protein) complex; GARP is required for the recycling of proteins from endosomes to the late Golgi
YBL036C	Putative non-specific single-domain racemase; based on structural similarity; binds pyridoxal 5'-phosphate; expression of GFP-fusion protein induced in response to the DNA-damaging agent MMS
YCL001W	Cytoplasm (Golgi apparatus). Protein involved in retention of membrane proteins; including Sec12p, in the ER; localized to Golgi; functions as a retrieval receptor in returning membrane proteins to the ER
YCL001WA	Hypothetical protein; YCL001W-A gene has similarity to DOM34
YER077C	Mitochondria. Hypothetical protein; green fluorescent protein (GFP)-fusion protein localizes to the mitochondrion; null mutation results in a decrease in plasma membrane electron transport
YHR009C	Cytoplasm (vacuole). Putative oxidoreductase involved in late endosome to Golgi transport; physical and genetical interactions with Btn2p; null mutant is viable, has extended S phase, and sensitive to expression of top1-T722A allele; similar to human FOXRED1
YLR125W	Hypothetical protein; mutant has decreased Ty3 transposition
Community I, B
Loccated in the cytoplasm
MAP kinase and mRNA processing, potential nutrient sensing module for glycerol and amino acid starvation
AEP2	Mitochondria. Likely involved in translation of the mitochondrial OLI1 mRNA
AIM10	Mitochondria. Protein with similarity to tRNA synthetases; non-tagged protein is detected in purified mitochondria; null mutant is viable and displays elevated frequency of mitochondrial genome loss
BOI2	Cytoplasm. Protein implicated in polar growth, functionally redundant with Boi1p; interacts with bud-emergence protein Bem1p; contains an SH3 (src homology 3) domain and a PH (pleckstrin homology) domain;
CBP2	Mitochondria. Required for splicing of the group I intron bI5 of the COB pre-mRNA; nuclear-encoded mitochondrial protein that binds to the RNA to promote splicing; also involved in but not essential for splicing of the COB bI2 intron and the intron in the 21S rRNA gene
CIN4	Cytoplasm. GTP-binding protein involved in beta-tubulin (Tub2p) folding; isolated as mutant with increased chromosome loss and sensitivity to benomyl; regulated by the GTPase-activating protein, Cin2p, the human retinitis pigmentosa 2 (RP2) homolog
CNM67	Cytoplasm. Component of the spindle pole body outer plaque; required for spindle orientation and mitotic nuclear migration; CNM67 has a paralog, ADY3, that arose from the whole genome duplication
CYK3	Cytoplasm. H3-domain protein located in the bud neck and cytokinetic actin ring; relocalizes from bud neck to nucleus upon DNA replication stress; activates the chitin synthase activity of Chs2p during cytokinesis
DCS1	Cytoplasm. Non-essential hydrolase involved in mRNA decapping; activates Xrn1p; may function in a feedback mechanism to regulate deadenylation, contains pyrophosphatase activity and a HIT (histidine triad) motif; acts as inhibitor of neutral trehalase Nth1p; required for growth on glycerol medium; protein abundance increases in response to DNA replication stress
GDH1	Cytoplasm. ADP(+)-dependent glutamate dehydrogenase; synthesizes glutamate from ammonia and alpha-ketoglutarate; rate of alpha-ketoglutarate utilization differs from Gdh3p; expression regulated by nitrogen and carbon sources
HFM1	Nucleus. Meiosis specific DNA helicase; involved in the conversion of double-stranded breaks to later recombination intermediates and in crossover control; catalyzes the unwinding of Holliday junctions
HOG1	Cytoplasm. Mitogen-activated protein kinase involved in osmoregulation
HOM6	Cytoplasm. Homoserine dehydrogenase (L-homoserine:NADP oxidoreductase); dimeric enzyme that catalyzes the third step in the common pathway for methionine and threonine biosynthesis; enzyme has nucleotide-binding, dimerization and catalytic regions
HOT1	Nucleus. Transcription factor for glycerol biosynthetic genes; required for the transient induction of glycerol biosynthetic genes GPD1 and GPP2 in response to high osmolarity; targets Hog1p to osmostress responsive promoters
HSP31	Cytoplasm. Methylglyoxalase that converts methylglyoxal to D-lactate; involved in oxidative stress resistance, diauxic shift, and stationary phase survival; has similarity to E. coli Hsp31 and C. albicans Glx3p; member of the DJ-1/ThiJ/PfpI superfamily, which includes human DJ-1 involved in Parkinson's disease and cancer; exists as a dimer and contains a putative metal-binding site; protein abund…
LSM1	Cytoplasm. Lsm (Like Sm) protein; part of heteroheptameric complexes (Lsm2p-7p and either Lsm1p or 8p): cytoplasmic Lsm1p complex involved in mRNA decay; nuclear Lsm8p complex part of U6 snRNP and possibly involved in processing tRNA, snoRNA, and rRNA
LSM6	Cytoplasm. Lsm (Like Sm) protein; part of heteroheptameric complexes (Lsm2p-7p and either Lsm1p or 8p): cytoplasmic Lsm1p complex involved in mRNA decay; nuclear Lsm8p complex part of U6 snRNP and possibly involved in processing tRNA, snoRNA, and rRNA
MDM1	Cytoplasm. Intermediate filament protein; required for nuclear and mitochondrial transmission to daughter buds; contains a Phox homology (PX) domain and specifically binds phosphatidylinositol 3-phosphate (PtdIns-3-P)
MIG3	Nucleus and cytoplasm. Transcriptional regulator; partially nonfunctional in S288C strains but has a major role in catabolite repression and ethanol response in some other strains; involved in response to toxic agents; phosphorylation by Snf1p or the Mec1p pathway inactivates Mig3p, allowing induction of damage response genes
MSH1	Mitochondria. DNA-binding protein of the mitochondria; involved in repair of mitochondrial DNA; has ATPase activity and binds to DNA mismatches; has homology to E. coli MutS; transcription is induced during meiosis
MSN2	Nucleus. Stress-responsive transcriptional activator; activated in stochastic pulses of nuclear localization in response to various stress conditions; binds DNA at stress response elements of responsive genes; relative distribution to nucleus increases upon DNA replication stress
MTM1	Mitochondria. Mitochondrial protein of the mitochondrial carrier family; high affinity pyridoxal 5'-phosphate transporter; involved in mitochondrial iron homeostasis and in activating mitochondrial Sod2p by facilitating insertion of an essential manganese cofactor
PAB1	Cytoplasm. Poly(A) binding protein; part of the 3'-end RNA-processing complex, mediates interactions between the 5' cap structure and the 3' mRNA poly(A) tail, involved in control of poly(A) tail length, interacts with translation factor eIF-4G; stimulates, but is not required for the deadenylation activity of the Pan2p-Pan3p poly(A)-ribonuclease complex
PBS2	Cytoplasm. Mitogen-activated protein kinase involved in osmoregulation
PET56	Mitochondria. Ribose methyltransferase; modifies a functionally critical, conserved nucleotide in mitochondrial 21S rRNA
PKH2	Cytoplasm. Serine/threonine protein kinase
PSY4	Nucleus and cytoplasm. Regulatory subunit of protein phosphatase PP4; presence of Psy4p in the PP4 complex (along with catalytic subunit Pph3p and Psy2p) is required for dephosphorylation of the histone variant H2AX, but not for dephosphorylation of Rad53p, during recovery from the DNA damage checkpoint; localization is cell-cycle dependent and regulated by Cdc28p phosphorylation; required for ci…
PTP3	Cytoplasm. Phosphotyrosine-specific protein phosphatase; involved in the inactivation of mitogen-activated protein kinase (MAPK) during osmolarity sensing; dephosporylates Hog1p MAPK and regulates its localization; localized to the cytoplasm
SEC14	Cytoplasm and Golgi apparatus. Phosphatidylinositol/phosphatidylcholine transfer protein; involved in regulating PtdIns, PtdCho, and ceramide metabolism, products of which regulate intracellular transport and UPR; has a role in localization of lipid raft proteins
SHO1	Cytoplasm Transmembrane osmosensor for filamentous growth and HOG pathways; involved in activation of the Cdc42p- and MAP kinase-dependent filamentous growth pathway and the high-osmolarity glycerol (HOG) response pathway; phosphorylated by Hog1p; interacts with Pbs2p, Msb2p, Hkr1p, and Ste11p
SLM5	Mitochondria. Mitochondrial asparaginyl-tRNA synthetase
SSD1	Cytoplasm Translational repressor with a role in polar growth and wall integrity; regulated by Cbk1p phosphorylation to effect bud-specific translational control and localization of specific mRNAs; interacts with TOR pathway components; contains a functional N-terminal nuclear localization sequence and nucleocytoplasmic shuttling appears to be critical to Ssd1p function
STE11	Cytoplasm. Signal transducing MEK kinase; involved in pheromone response and pseudohyphal/invasive growth pathways where it phosphorylates Ste7p, and the high osmolarity response pathway, via phosphorylation of Pbs2p; regulated by Ste20p and Ste50p; protein abundance increases in response to DNA replication stress
STE20	Cytoplasm. Cdc42p-activated signal transducing kinase; involved in pheromone response, pseudohyphal/invasive growth, vacuole inheritance, down-regulation of sterol uptake; GBB motif binds Ste4p; member of the PAK (p21-activated kinase) family
STE50	Cytoplasm. Adaptor protein for various signaling pathways; involved in mating response, invasive/filamentous growth, osmotolerance; acts as an adaptor that links G protein-associated Cdc42p-Ste20p complex to the effector Ste11p to modulate signal transduction
WHI2	Protein required for full activation of the general stress response; required with binding partner Psr1p, possibly through Msn2p dephosphorylation; regulates growth during the diauxic shift; negative regulator of G1 cyclin expression
XRN1	Cytoplasm. Evolutionarily-conserved 5'-3' exonuclease; component of cytoplasmic processing (P) bodies involved in mRNA decay; also enters the nucleus and positively regulates transcription initiation and elongation; plays a role in microtubule-mediated processes, filamentous growth, ribosomal RNA maturation, and telomere maintenance
Community I, C
Mixed population of nuclear and mitochondrial proteins
Mostly involved gene transcription regulation and cytoskeleton, contain the adenyl cyclase complex, potential nutrient sensing module for starvation
ABF2	Mitochondria. Mitochondrial DNA-binding protein; involved in mitochondrial DNA backing replication and recombination, member of HMG1 DNA-binding protein family; activity may be regulated by protein kinase A phosphorylation
ACT1	Cytoplasm. Actin; structural protein involved in cell polarization, endocytosis, and other cytoskeletal functions
ARP8	Nucleus and cytoplasm. Nuclear actin-related protein involved in chromatin remodeling; component of chromatin-remodeling enzyme complexes; has mRNA binding activity
CHC1	Cytoplasm. Clathrin heavy chain; subunit of the major coat protein involved in intracellular protein transport and endocytosis; the clathrin triskelion is a trimeric molecule composed of three heavy chains that radiate from a vertex and three light chains which bind noncovalently near the vertex of the triskelion; the light chain (CLC1) is thought to regulate function
CLU1	Cytoplasm. Subunit of the eukaryotic translation initiation factor 3 (eIF3); component of unknown function; deletion causes defects in mitochondrial organization but not in growth or translation initiation
COF1	Cytoplasm. Cofilin, involved in pH-dependent actin filament depolarization; binds both actin monomers and filaments and severs filaments; involved in the selective sorting, export of the secretory cargo from the late golgi
CYR1	Cytoplasm (ER), ands mitochondria. Adenylate cyclase; required for cAMP production and cAMP-dependent protein kinase signaling; the cAMP pathway controls a variety of cellular processes, including metabolism, cell cycle, stress response, stationary phase, and sporulation
EX05	Mitochondria . mitochondrial 5'-3' exonuclease and sliding exonuclease; required for mitochondrial genome maintenance; distantly related to the RecB nuclease domain of bacterial RecBCD recombinases; may be regulated by the transcription factor Ace2
HFI1	Nucleus. Adaptor protein required for structural integrity of the SAGA complex; a histone acetyltransferase-coactivator complex that is involved in global regulation of gene expression through acetylation and transcription functions
HHF1	Nucleus. Histone H4; core histone protein required for chromatin assembly and chromosome function; one of two identical histone proteins (see also HHF2); contributes to telomeric silencing; N-terminal domain involved in maintaining genomic integrity
HMI1	Mitochondria. Mitochondrial inner membrane localized ATP-dependent DNA helicase; required for the maintenance of the mitochondrial genome
HTB2	Nucleus. Histone H2B; core histone protein required for chromatin assembly and chromosome function; nearly identical to HTB1; Rad6p-Bre1p-Lge1p mediated ubiquitination regulates reassembly after DNA replication, transcriptional activation, meiotic DSB formation and H3 methylation
IES6	Nucleus. Component of the INO80 chromatin remodeling complex; critical for INO80 function; involved in regulation of chromosome segregation and maintenance of normal centromeric chromatin structure; human ortholog INO80C is a member of the human INO80 complex
ILV5	Mitochondria. Acetohydroxyacid reductoisomerase and mtDNA binding protein; involved in branched-chain amino acid biosynthesis and maintenance of wild-type mitochondrial DNA; found in mitochondrial nucleoids
MIP1	Mitochondria. Mitochondrial DNA polymerase gamma subunit; conserved C-terminal segment is required for the maintenance of mitochondrial genome; its human ortholog, POLG, can rescue mip1 phenotypes, and mutations in POLG are associated with Alpers-Huttenlocher syndrome (AHS) and other mitochondrial diseases; Mip1p is the single subunit of mitochondrial DNA polymerase in yeast, in contrast to metaz…
MMS22	Nucleus. Subunit of E3 ubiquitin ligase complex involved in replication repair; stabilizes protein components of the replication fork, such as the fork-pausing complex and leading strand polymerase, preventing fork collapse and promoting efficient recovery during replication stress; required for accurate meiotic chromosome segregation
MOT1	Nucleus. Essential protein involved in regulation of transcription; removes Spt15p (TBP) from DNA via its C-terminal ATPase activity; may have a role in ensuring that soluble TBP is available to bind TATA-less promoters; forms a complex with TBP that binds TATA DNA with high affinity but with altered specificity; the Mot1p-Spt15p-DNA ternary complex contains unbent DNA
MOT3	Nucleus. Transcriptional repressor and activator with two C2-H2 zinc fingers; involved in repression of a subset of hypoxic genes by Rox1p, repression of several DAN/TIR genes during aerobic growth and ergosterol biosynthetic genes in response to hyperosmotic stress; contributes to recruitment of Tup1p-Cyc8p general repressor to promoters; involved in positive transcriptional regulation of CWP2 a…
NGG1	Nucleus. Subunit of chromatin modifying histone acetyltransferase complexes; member of the ADA complex, the SAGA complex, and the SLIK complex; transcriptional regulator involved in glucose repression of Gal4p-regulated genes
NUP170	Nucleus. Subunit of the inner ring of the nuclear
OSS1	Cytoplasm. Protein with a role in regulating Swe1p-dependent polarized growth
PFY1	Cytoplasm. Profilin; binds actin, phosphatidylinositol 4,5-bisphosphate, and polyproline regions; involved in cytoskeleton organization; required for normal timing of actin polymerization in response to thermal stress; protein abundance increases in response to DNA replication stress
PPA1	Mitochondria . Mitochondrial inorganic pyrophosphatase; required for mitochondrial function and possibly involved in energy generation from inorganic pyrophosphate
PPA2	Mitochondria . Mitochondrial inorganic pyrophosphatase; required for mitochondrial function and possibly involved in energy generation from inorganic pyrophosphate
RRG6	Mitochondria and cytoplasm. Subunit of the trimeric GatFAB AmidoTransferase(AdT) complex
SAC6	Cytoplasm. fimbrin, actin-bundling protein; cooperates with Scp1p (calponin/transgelin) in the organization and maintenance of the actin cytoskeleton; relocalizes from plasma membrane to cytoplasm upon DNA replication stress
Sec20	Cytoplasm (ER, vesicles, Golgi apparatus). Membrane glycoprotein v-SNARE; involved in retrograde transport from the Golgi to the endoplasmic reticulum (ER)
SGF29	Nucleus. Component of the HAT/Core module of the SAGA, SLIK, and ADA complexes; HAT/Core module also contains Gcn5p, Ngg1p, and Ada2p; binds methylated histone H3K4; involved in transcriptional regulation through SAGA and TBP recruitment to target promoters and H3 acetylation
SNX4	Cytoplasm (ER, vesicles, Golgi apparatus). Sorting nexin; involved in retrieval of late-Golgi SNAREs from post-Golgi endosomes to the trans-Golgi network and in cytoplasm to vacuole transport
SOK1	Nucleus. Hypothetical protein; overexpression suppresses the growth defect of mutants lacking protein kinase A activity; involved in cAMP-mediated signaling; localized to the nucleus
SPT20	Nucleus. Subunit of the SAGA transcriptional regulatory complex; involved in maintaining the integrity of the complex; mutant displays reduced transcription elongation in the G-less-based run-on (GLRO) assay
SPT3	Nucleus. Subunit of the SAGA and SAGA-like transcriptional regulatory complexes; interacts with Spt15p to activate transcription of some RNA polymerase II-dependent genes, also functions to inhibit transcription at some promoters; relocalizes to the cytosol in response to hypoxia
SRV2	Cytoplasm. CAP (cyclase-associated protein); N-terminus binds adenylate cyclase and facilitates activation by RAS; N-terminus forms novel hexameric star-shaped shuriken structures that directly catalyze cofilin-mediated severing of actin filaments; C-terminus, in physically and genetically separate activity, binds and recycles cofilin bound, ADP-actin monomers, facilitating regulation of actin dy…
THR4	Cytoplasm. Threonine synthase; conserved protein that catalyzes formation of threonine from O-phosphohomoserine; expression is regulated by the GCN4-mediated general amino acid control pathway
TPM1	Cytoplasm. Major isoform of tropomyosin; binds to and stabilizes actin cables and filaments, which direct polarized cell growth and the distribution of several organelles; acetylated by the NatB complex and acetylated form binds actin most efficiently
TUB1	Cytoplasm. Alpha-tubulin; associates with beta-tubulin (Tub2p) to form tubulin dimer, which polymerizes to form microtubules
VPS1	Mitochondria and cytoplasm (endosome) . Dynamin-like GTPase required for vacuolar sorting; also involved in actin cytoskeleton organization, endocytosis, late Golgi-retention of some proteins, regulation of peroxisome biogenesis
Community I, D
Located in the cytoplasm, endosme, ER, and Golgi
Mostly involved endocytosis (vesicle coating and trafficking)
ACO1	Mitochondria. Aconitase; required for the tricarboxylic acid (TCA) cycle and also independently required for mitochondrial genome maintenance; phosphorylated; component of the mitochondrial nucleoid; mutation leads to glutamate auxotrophy
BUD16	Cytoplasm. Putative pyridoxal kinase; a key enzyme involved in pyridoxal 5'-phosphate synthesis, the active form of vitamin B6; required for genome integrity; involved in bud-site selection
BUG1	Cytoplam (ER and Golgi apparatus). Cis-golgi localized protein involved in ER to Golgi transport; forms a complex with the mammalian GRASP65 homolog, Grh1p; mutants are compromised for the fusion of ER-derived vesicles with Golgi membranes
CCT4	Cytoplasm. Subunit of the cytosolic chaperonin Cct ring complex; related to Tcp1p, required for the assembly of actin and tubulins in vivo
CCT6	Cytoplasm. Subunit of the cytosolic chaperonin Cct ring complex; related to Tcp1p, essential protein that is required for the assembly of actin and tubulins in vivo; contains an ATP-binding motif
CLC1	Cytoplasm. Clathrin light chain; subunit of the major coat protein involved in intracellular protein transport and endocytosis; regulates endocytic progression; thought to regulate clathrin
DNM1	Mitochondria and cytoplasm (peroxisome). Dynamin-related GTPase involved in mitochondrial organization; required for mitochondrial fission and morphology; assembles on the cytoplasmic face of mitochondrial tubules at sites at which division will occur; also participates in endocytosis and regulating peroxisome abundance
ELP3	Nucleus and cytoplam. Subunit of Elongator complex; Elongator is required for modification of wobble nucleosides in tRNA; exhibits histone acetyltransferase activity that is directed to histones H3 and H4
ENT5	Cytoplasm (endosome). Protein containing an N-terminal epsin-like domain; involved in clathrin recruitment and traffic between the Golgi and endosomes; associates with the clathrin adaptor Gga2p, clathrin adaptor complex AP-1, and clathrin
FAB1	Cytoplasm (endosome). 1-phosphatidylinositol-3-phosphate 5-kinase; vacuolar membrane kinase that generates phosphatidylinositol (3,5)P2, which is involved in vacuolar sorting and homeostasis
GCN2	Cytosolic ribosome. Protein kinase; phosphorylates the alpha-subunit of translation initiation factor eIF2 (Sui2p) in response to starvation; activated by uncharged tRNAs and the Gcn1p-Gcn20p complex; contributes to DNA damage checkpoint control
GIN4	Cytoplasm. Protein kinase involved in bud growth and assembly of the septin ring; proposed to have kinase-dependent and kinase-independent activities; undergoes autophosphorylation; similar to Hsl1p; GIN4 has a paralog, KCC4, that arose from the whole genome duplication
HRR25	ER and Golgi apparatus. Protein kinase; involved in regulating diverse events including vesicular trafficking, DNA repair, and chromosome segregation
IRA2	ER and mitochondria. GTPase-activating protein; negatively regulates RAS by converting it from the GTP- to the GDP-bound inactive form, required for reducing cAMP levels under nutrient limiting conditions; similar to human neurofibromin; IRA2 has a paralog, IRA1, that arose from the whole genome duplication
ISN1	Inosine 5'-monophosphate (IMP)-specific 5'-nucleotidase; catalyzes the breakdown of IMP to inosine; responsible for production of nicotinamide riboside and nicotinic acid riboside; expression positively regulated by nicotinic acid and glucose availability
MDM36	Mitochondria. Required for normal mitochondrial morphology and inheritance; component of the mitochondria-ER-cortex-ancor (MECA); interacts with Num1p to link the ER and mitochondria at the cell cortex; proposed involvement in the formation of Dnm1p and Num1p-containing cortical anchor complexes that promote mitochondrial fission
PKH1	Cytoplasm. Serine/threonine protein kinase; involved in sphingolipid-mediated signaling pathway that controls endocytosis; activates Ypk1p and Ykr2p, components of signaling cascade required for maintenance of cell wall integrity; redundant with Pkh2p; PKH1 has a paralog, PKH2, that arose from the whole genome duplication
RAI1	Cytoplasm. Protein with decapping endonuclease activity; targets mRNAs with unmethylated 7-methylguanosine cap structures and 5'-triphosphates; binds to and stabilizes the exoribonuclease Rat1p; required for pre-rRNA processing; relocalizes to the cytosol in response to hypoxia
RPL21A	Cytosolic large ribosomal subunit. Ribosomal 60S subunit protein L21A
RPS11A	Cytosolic small ribosomal subunit. Protein component of the small (40S) ribosomal subunit
RRG9	Mitochondria. Hypothetical protein; null mutant lacks mitochondrial DNA and cannot grow on glycerol
SDA1	Nucleus. Protein required for actin organization and passage through Start; highly conserved nuclear protein; required for actin cytoskeleton organization; plays a critical role in G1 events
SIT4	Cytoplasm. Type 2A-related serine-threonine phosphatase; functions in the G1/S transition of the mitotic cycle; regulator of COPII coat dephosphorylation; required for ER to Golgi traffic; interacts with Hrr25p kinase; cytoplasmic and nuclear protein that modulates functions mediated by Pkc1p including cell wall and actin cytoskeleton organization
SKI3	Nucleus and cytoplasm. Ski complex component and TPR protein; mediates 3'-5' RNA degradation by the cytoplasmic exosome; null mutants have superkiller phenotype of increased viral dsRNAs and are synthetic lethal with mutations in 5'-3' mRNA decay
THR1	Cytoplasm. Homoserine kinase; conserved protein required for threonine biosynthesis; long-lived protein that is preferentially retained in mother cells and forms cytoplasmic filaments; expression is regulated by the GCN4-mediated general amino acid control pathway
Community I, E
Located in the cytoplasm
Mostly involved in actin cytoskeleton dynamics
ACF2	Cytoplasm. Intracellular beta-1,3-endoglucanase; expression is induced during sporulation; may have a role in cortical actin cytoskeleton assembly; protein abundance increases in response to DNA replication stress
ADR1	Nucleus. Carbon source-responsive zinc-finger transcription factor; required for transcription of the glucose-repressed gene ADH2, of peroxisomal protein genes, and of genes required for ethanol, glycerol, and fatty acid utilization
ARC15	Cytoplasm. Subunit of the ARP2/3 complex; ARP2/3 is required for the motility and integrity of cortical actin patches; has mRNA binding activity
ARC35	Cytoplasm. Subunit of the ARP2/3 complex; ARP2/3 is required for the motility and integrity of cortical actin patches; required for cortical localization of calmodulin
ARC40	Cytoplasm. Subunit of the ARP2/3 complex; ARP2/3 is required for the motility and integrity of cortical actin patches
ARP2	Cytoplasm. Essential component of the Arp2/3 complex; Arp2/3 is a highly conserved actin nucleation center required for the motility and integrity of actin patches; involved in endocytosis and membrane growth and polarity; required for efficient Golgi-to-ER trafficking in COPI mutants
CDC40	Nucleus. Pre-mRNA splicing factor; important for catalytic step II of pre-mRNA splicing and plays a role in cell cycle progression; required for DNA synthesis during mitosis and meiosis; has WD repeats
COA4	Mitochondria. Twin Cx(9)C protein involved in cytochrome c oxidase organization; organization includes assembly or stability; localizes to the mitochondrial intermembrane space via the Mia40p-Erv1p system
END3	Cytoplasm. EH domain-containing protein involved in endocytosis and actin cytoskeletal organization and cell wall morphogenesis; forms a complex with Sla1p and Pan1p
MGE1	Mitochondria. Mitochondrial matrix cochaperone; nucleotide release factor for Ssc1p in protein translocation and folding; also acts as cochaperone for Ssq1p in folding of Fe-S cluster proteins; acts as oxidative sensor to regulate mitochondrial Ssc1p;
LAS17	Cytoplasm. Actin assembly factor; C-terminal WCA domain activates Arp2/3 complex-mediated nucleation of branched actin filaments and a polyproline domain which can nucleate actin filaments independent of Arp2/3; mutants are defective in actin cytoskeleton dependent processes such as: endocytosis, bud site selection and cytokinesis; localizes with the Arp2/3 complex to actin cortical patches
MEF2	Cytoplasm. Actin assembly factor; C-terminal WCA domain activates Arp2/3 complex-mediated nucleation of branched actin filaments and a polyproline domain which can nucleate actin filaments independent of Arp2/3; mutants are defective in actin cytoskeleton dependent processes such as: endocytosis, bud site selection and cytokinesis; localizes with the Arp2/3 complex to actin cortical patches
MKK2	Cytoplasm. MAPKK involved in the protein kinase C signaling pathway cell wall integrate and bud neck location; involved in control of cell integrity; upon activation by Bck1p phosphorylates downstream target, Slt2p; functionally redundant with Mkk1p
PAN1	Cytoplasm. Part of actin cytoskeleton-regulatory complex Pan1p-Sla1p-End3p; associates with actin patches on cell cortex; promotes protein-protein interactions essential for endocytosis; binds to and activates Arp2/3 complex in vitro; phosphorylation of Thr-1225 is regulated by MAPK Hog1p in response to osmotic stress
PHO80	Nucleus and cytoplasm. Cyclin; interacts with cyclin-dependent kinase Pho85p; regulates the response to nutrient levels and environmental conditions, including the response to phosphate limitation and stress-dependent calcium signaling
RVS161	Cytoplasm. Amphiphysin-like lipid raft protein; interacts with Rvs167p and regulates polarization of the actin cytoskeleton, endocytosis, cell polarity, cell fusion and viability following starvation or osmotic stress
RVS167	Cytoplasm. Actin-associated protein with roles in endocytosis and exocytosis; interacts with Rvs161p to regulate actin cytoskeleton, endocytosis, and viability following starvation or osmotic stress; recruited to bud tips by Gyl1p and Gyp5p during polarized growth
SPS1	Nucleus and cytoplasm. Putative protein serine/threonine kinase; expressed at the end of meiosis and localized to the prospore membrane; required for correct localization of enzymes involved in spore wall synthesis
SSQ1	Mitochondria. Mitochondrial hsp70-type molecular chaperone; required for assembly of iron/sulfur clusters into proteins at a step after cluster synthesis, and for maturation of Yfh1p
VPS13	Mitochondria and cytoplasm (Golgi apparatuse and endosome). Protein involved in prospore membrane morphogenesis; heterooligomeric or homooligomeric complex; peripherally associated with membranes; involved in sporulation, vacuolar protein sorting, prospore membrane formation during sporulatoin, and protein-Golgi retention
VRP1	Cytoplasm. Verprolin, proline-rich actin-associated protein; involved in cytoskeletal organization and cytokinesis; promotes actin nucleation and endocytosis
YHL008C	Membrane and endosome. hypothetical protein; may be involved in the uptake of chloride ions; does not appear to be involved in monocarboxylic acid transport; green fluorescent protein (GFP)-fusion protein localizes to the vacuole
Community I, F
Located in the cytoplasm
Mostly exocyst complex, involve in polarized growth of the bud neck and mating projection
ATG33	Mitochondria. Mitochondrial mitophagy-specific protein; required primarily for mitophagy induced at post-log phase; not required for other types of selective autophagy or macroautophagy
BUB1	Nucleus. Protein kinase involved in the cell cycle checkpoint into anaphase; in complex with Mad1p and Bub3p, prevents progression into anaphase in presence of spindle damage; Cdc28p-mediated phosphorylation at Bub1p-T566 is important for degradation in anaphase and adaptation of checkpoint to prolonged mitotic arrest; associates with centromere DNA via Skp1p; involved in Sgo1p relocalization in …
FBP1	Cytosol and periplasmic space. Fructose-1,6-bisphosphatase; key regulatory enzyme in the gluconeogenesis pathway, required for glucose metabolism; undergoes either proteasome-mediated or autophagy-mediated degradation depending on growth conditions; glucose starvation results in redistribution to the periplasm
IQG1	Cytoplasm. . Actin filament organization, essential protein required for determination of budding pattern; promotes localization of axial markers Bud4p and Cdc12p and functionally interacts with Sec3p, localizes to the contractile ring during anaphase
KCS1	Cytoplasm. Inositol hexakisphosphate and inositol heptakisphosphate kinase; generation of high energy inositol pyrophosphates by Kcs1p is required for many processes such as vacuolar biogenesis, stress response, and telomere maintenance
LSM1	Nucleus and cytoplasm. Lsm (Like Sm) protein; forms heteroheptameric complex (with Lsm2p, Lsm3p, Lsm4p, Lsm5p, Lsm6p, and Lsm7p) involved in degradation of cytoplasmic mRNAs; also enters the nucleus and positively regulates transcription initiation; unlike most Sm-like proteins, Lsm1p requires both its SM-domain and C-terminal domain for RNA-binding; binds to mRNAs under glucose starvation, most …
LUV1	Cytoplasm, Golgi apparatus, mitochondria, endosome. Component of the GARP (Golgi-associated retrograde protein) complex; GARP is required for the recycling of proteins from endosomes to the late Golgi, and for mitosis after DNA damage induced checkpoint arrest; potentially phosphorylated by Cdc28p; members of the GARP complex are Vps51p-Vps52p-Vps53p-Vps54p
MLC1	Cytoplasm. Myosin light chain motor. Essential light chain for Myo1p; light chain for Myo2p; stabilizes Myo2p by binding to the neck region; interacts with Myo1p, Iqg1p, and Myo2p to coordinate formation and contraction of the actomyosin ring with targeted membrane deposition
MYO1	Cytoplasm. Type II myosin heavy chain; required for wild-type cytokinesis and cell separation; localizes to the actomyosin ring; binds to myosin light chains Mlc1p and Mlc2p through its IQ1 and IQ2 motifs respectively
MYO2	Cytoplasm.Type V myosin motor involved in actin-based transport of cargos; required for the polarized delivery of secretory vesicles, the vacuole, late Golgi elements, peroxisomes, and the mitotic spindle; MYO2 has a paralog, MYO4, that arose from the whole genome duplication
RGA1	Cytoplasm. Cytoskeleton GTPase-activating protein for polarity-establishment protein Cdc42p; implicated in control of septin organization, pheromone response, and haploid invasive growth; relocalizes from bud neck to cytoplasm upon DNA replication stress
SEC10	Cytoplasm. Essential 100kDa subunit of the exocyst complex; the exocyst mediates polarized targeting and tethering of post-Golgi secretory vesicles to active sites of exocytosis at the plasma membrane prior to SNARE-mediated fusion
SEC15	Cytoplasm. Essential 113 kDa subunit of the exocyst complex; the exocyst mediates polarized targeting and tethering of post-Golgi secretory vesicles to active sites of exocytosis prior to SNARE-mediated fusion; interacts with and functions as a downstream effector of active, GTP-bound Sec4p, a Rab family GTPase
SEC3	Cytoplasm. Subunit of the exocyst complex; the exocyst mediates polarized targeting and tethering of post-Golgi secretory vesicles to sites of exocytosis prior to SNARE-mediated fusion; PtdIns[4,5]P2-binding protein that localizes to exocytic sites in a Rho1p-dependent, actin-independent manner, targeting and anchoring the exocyst to the plasma membrane with Exo70p; direct GTP Rho1p effector; req…
SEC5	Cytoplasm. Essential 107kDa subunit of the exocyst complex; the exocyst mediates polarized targeting and tethering of post-Golgi secretory vesicles to active sites of exocytosis at the plasma membrane prior to SNARE-mediated fusion; involved in assembly of the exocyst complex; required with Sec3p for ER inheritance where it promotes anchoring of the cortical ER at the bud tip
SEC8	Cytoplasm. Essential 121 kDa subunit of the exocyst complex; the exocyst mediates polarized targeting and tethering of post-Golgi secretory vesicles to active sites of exocytosis at the plasma membrane prior to SNARE-mediated fusion; involved in ER and Golgi inheritance in small buds; relocalizes away from bud neck upon DNA replication stress
TCO89	Cytoplasm. Subunit of TORC1 (Tor1p or Tor2p-Kog1p-Lst8p-Tco89p); regulates global H3K56ac; TORC1 complex regulates growth in response to nutrient availability; cooperates with Ssd1p in the maintenance of cellular integrity; deletion strains are hypersensitive to rapamycin
UBP14	Cytosol and periplasmic space. Ubiquitin-specific protease; specifically disassembles unanchored ubiquitin chains; involved in fructose-1,6-bisphosphatase (Fbp1p) degradation; similar to human isopeptidase T
USE1	Cytoplasm (ER, vesicles, Golgi apparatus). Essential SNARE protein localized to the ER; involved in retrograde traffic from the Golgi to the ER
Community I, G
Located in the cytoplasm
Mostly SCF ubiquitin-protein ligase complex, involve in glucose detection, potential nutrient sensing module
CDC34	Cytoplasm. Ubiquitin-conjugating enzyme (E2); catalytic subunit of SCF ubiquitin-protein ligase complex, cell cycle G1-S transition
CDC53	Cytoplasm. Ubiquitin-conjugating enzyme (E2); scaffold of the SCF ubiquitin-protein ligase complex, cell cycle G1-S transition
CTK3	Nucleus and cytoplasm. Gamma subunit of C-terminal domain kinase I; CTDK-I phosphorylates RNA polymerase II subunit Rpo21p to affect transcription and pre-mRNA 3' end processing, and also phosphorylates ribosomal protein Rps2p to increase translational fidelity; protein abundance increases in response to DNA replication stress
CYS3	Cytoplasm. Cystathionine gamma-lyase; catalyzes one of the two reactions involved in the transsulfuration pathway that yields cysteine from homocysteine with the intermediary formation of cystathionine; protein abundance increases in response to DNA replication stress
FAS1	Cytoplasm. Beta subunit of fatty acid synthetase; complex catalyzes the synthesis of long-chain saturated fatty acids; contains acetyltransacylase, dehydratase, enoyl reductase, malonyl transacylase, and palmitoyl transacylase activities
GRR1	Cytoplasm. F-box protein component of an SCF ubiquitin-ligase complex; modular substrate specificity factor which associates with core SCF (Cdc53p, Skp1p and Hrt1p/Rbx1p) to form the SCF(Grr1) complex; SCF(Grr1) acts as a ubiquitin-protein ligase directing ubiquitination of substrates such as: Gic2p, Mks1p, Mth1p, Cln1p, Cln2p and Cln3p; involved in carbon catabolite repression, glucose-dependent…
HFA1	Mitochondria and cytoplasm. Mitochondrial acetyl-coenzyme A carboxylase; catalyzes production of malonyl-CoA in mitochondrial fatty acid biosynthesis; relocalizes from mitochondrion to cytoplasm upon DNA replication stress; HFA1 has a paralog, ACC1, that arose from the whole genome duplication
MSK1	Mitochondria and cytoplasm. Mitochondrial lysine-tRNA synthetase; required for import of both aminoacylated and deacylated forms of tRNA(Lys) into mitochondria and for aminoacylation of mitochondrially encoded tRNA(Lys)
MTH1	Cytoplasm. Negative regulator of the glucose-sensing signal transduction pathway; required for repression of transcription by Rgt1p; interacts with Rgt1p and the Snf3p and Rgt2p glucose sensors; phosphorylated by Yck1p, triggering Mth1p degradation; MTH1 has a paralog, STD1, that arose from the whole genome duplication
PTC1	Mitochondria and cytoplasm. Type 2C protein phosphatase (PP2C); dephosphorylates Hog1p, inactivating osmosensing MAPK cascade; involved in Fus3p activation during pheromone response; deletion affects precursor tRNA splicing, mitochondrial inheritance, and sporulation
RAD6	Cytoplasm. Ubiquitin-conjugating enzyme (E2); involved in postreplication repair as a heterodimer with Rad18p, DSBR and checkpoint control as a heterodimer with Bre1p, ubiquitin-mediated N-end rule protein degradation as a heterodimer with Ubr1p, as well as endoplasmic reticulum-associated protein degradation (ERAD) with Ubr1p in the absence of canonical ER membrane ligases
RNR4	Nucleus and cytoplasm. Ribonucleotide-diphosphate reductase (RNR) small subunit; the RNR complex catalyzes the rate-limiting step in dNTP synthesis and is regulated by DNA replication and DNA damage checkpoint pathways via localization of the small subunits; relocalizes from nucleus to cytoplasm upon DNA replication stress; RNR4 has a paralog, RNR2, that arose from the whole genome duplication
STP2	Nucleus, cytoplasm, and membrane. Transcription factor; activated by proteolytic processing in response to signals from the SPS sensor system for external amino acids; activates transcription of amino acid permease genes; STP2 has a paralog, STP1, that arose from the whole genome duplication
UBA1	Cytoplasm, Ubiquitin activating enzyme (E1); involved in ubiquitin-mediated protein degradation and essential for viability; protein abundance increases in response to DNA replication stress
UFO1	Nucleus and cytoplasm. F-box receptor protein; subunit of the Skp1-Cdc53-F-box receptor (SCF) E3 ubiquitin ligase complex; binds to phosphorylated Ho endonuclease, allowing its ubiquitylation by SCF and subsequent degradation
YDJ1	Mitochondria and cytoplasm Type I HSP40 co-chaperone; involved in protein translocation across membranes; involve in protein ubiquination
Community II
Mostly mitochondrial proteins
Community II, A
Located in the cytoplasm, mostly Golgi apparatus and vacuoles
De novo lipid synthesis, vesicular trafficking from ER, acidification of vacuoles
ADH3	Mitochondria. Mitochondrial alcohol dehydrogenase isozyme III; involved in the shuttling of mitochondrial NADH to the cytosol under anaerobic conditions and ethanol production
CAF17	Mitochondria. Protein involved in incorporating iron-sulfur clusters into proteins
CBS1	Mitochondria. Mitochondrial translational activator of the COB mRNA
CSG2	Cytoplasm (ER). Endoplasmic reticulum membrane protein; required for mannosylation of inositolphosphorylceramide and for growth at high calcium concentrations; protein abundance increases in response to DNA replication stress
DRS2	Cytoplasm (Golgi apparatus and vacuole). Trans-Golgi network aminophospholipid translocase (flippase); maintains membrane lipid asymmetry in post-Golgi secretory vesicles; contributes to clathrin-coated vesicle formation, endocytosis, protein trafficking between the Golgi and endosomal system and the cellular response to mating pheromone
DSS1	Mitochondria. 3'-5' exoribonuclease; component of the mitochondrial degradosome along with the ATP-dependent RNA helicase Suv3p
ERG1	Mitochondria and cytoplasm (ER ). Squalene epoxidase; catalyzes the epoxidation of squalene to 2,3-oxidosqualene; plays an essential role in the ergosterol-biosynthesis pathway and is the specific target of the antifungal drug terbinafine
ERG13	Mitochondria and cytoplasm (ER ). Squalene epoxidase; catalyzes the epoxidation of squalene to 2,3-oxidosqualene; plays an essential role in the ergosterol-biosynthesis pathway and is the specific target of the antifungal drug terbinafine
ERG24	Mitochondria and cytoplasm (ER ). C-14 sterol reductase; acts in ergosterol biosynthesis; mutants accumulate the abnormal sterol ignosterol (ergosta-8,14 dienol), and are viable under anaerobic growth conditions but inviable on rich medium under aerobic conditions
ERG25	Mitochondria and cytoplasm (ER ). C-4 methyl sterol oxidase; catalyzes the first of three steps required to remove two C-4 methyl groups from an intermediate in ergosterol biosynthesis; mutants accumulate the sterol intermediate 4,4-dimethylzymosterol
ERG26	Mitochondria and cytoplasm (ER )). C-3 sterol dehydrogenase; catalyzes the second of three steps required to remove two C-4 methyl groups from an intermediate in ergosterol biosynthesis
ERG27	Mitochondria and cytoplasm (ER ). 3-keto sterol reductase; catalyzes the last of three steps required to remove two C-4 methyl groups from an intermediate in ergosterol biosynthesis; mutants are sterol auxotrophs
ERG28	Mitochondria and cytoplasm (ER ). Endoplasmic reticulum membrane protein; may facilitate protein-protein interactions between the Erg26p dehydrogenase and the Erg27p 3-ketoreductase and/or tether these enzymes to the ER, also interacts with Erg6p
ERG3	Mitochondria and cytoplasm (ER ). C-5 sterol desaturase; glycoprotein that catalyzes the introduction of a C-5(6) double bond into episterol, a precursor in ergosterol biosynthesis; mutants are viable, but cannot grow on non-fermentable carbon sources; substrate of the HRD ubiquitin ligase
ERG5	Mitochondria and cytoplasm (ER ). C-22 sterol desaturase; a cytochrome P450 enzyme that catalyzes the formation of the C-22(23) double bond in the sterol side chain in ergosterol biosynthesis; may be a target of azole antifungal drugs
ERG6	Mitochondria and cytoplasm (ER ). Squalene epoxidase; catalyzes the epoxidation of squalene to 2,3-oxidosqualene; plays an essential role in the ergosterol-biosynthesis pathway and is the specific target of the antifungal drug terbinafine
ERG7	Mitochondria and cytoplasm (ER ). Lanosterol synthase; an essential enzyme that catalyzes the cyclization of squalene 2,3-epoxide, a step in ergosterol biosynthesis
EXO5	Mitochondria. Mitochondrial 5'-3' exonuclease and sliding exonuclease; required for mitochondrial genome maintenance
FAS2	Mitochondria and cytoplasm. Alpha subunit of fatty acid synthetase; complex catalyzes the synthesis of long-chain saturated fatty acids; contains the acyl-carrier protein domain and beta-ketoacyl reductase, beta-ketoacyl synthase and self-pantetheinylation activities
FET3	Plasma membrane. Ferro-O2-oxidoreductase; multicopper oxidase that oxidizes ferrous (Fe2+) to ferric iron (Fe3+) for subsequent cellular uptake by transmembrane permease Ftr1p; required for high-affinity iron uptake and involved in mediating resistance to copper ion toxicity, belongs to class of integral membrane multicopper oxidases; protein abundance increases in response to DNA replication str…
FIS1	Cytoplasm (peroxisome and membranes) and mitochondria. Protein involved in mitochondrial fission and peroxisome abundance; required for localization of Dnm1p and Mdv1p during mitochondrial division; mediates ethanol-induced apoptosis and ethanol-induced mitochondrial fragmentation
FTR1	Plasma membrane. High affinity iron permease; involved in the transport of iron across the plasma membrane; forms complex with Fet3p; expression is regulated by iron; protein abundance increases in response to DNA replication stress
GCV3	Mitochondria. H subunit of the mitochondrial glycine decarboxylase complex; glycine decarboxylase is required for the catabolism of glycine
GET1	Cytoplasme (ER) and mitochondria. Subunit of the GET complex; involved in insertion of proteins into the ER membrane; required for the retrieval of HDEL proteins from the Golgi to the ER in an ERD2 dependent fashion and for normal mitochondrial morphology and inheritance
GUP1	Plasma membranes and cytoplasm (ER). Plasma membrane protein involved in remodeling GPI anchors; member of the MBOAT family of putative membrane-bound O-acyltransferases; role in misfolded protein quality control; proposed to be involved in glycerol transport
HMG1	Membranes. Catalyzes the conversion of HMG-CoA to mevalonate, which is a rate-limiting step in sterol biosynthesis; one of two isozymes; localizes to the nuclear envelope; overproduction induces the formation of karmellae; forms foci at the nuclear periphery upon DNA replication stressinvolved in glycerol transport
IMP1	Mitochondria. Catalytic subunit of mitochondrial inner membrane peptidase complex; required for maturation of mitochondrial proteins of the intermembrane space; complex contains two catalytic subunits (Imp1p and Imp2p that differ in substrate specificty) and Som1p
ISA2	Mitochondria. Protein required for maturation of mitochondrial [4Fe-4S] proteins; functions in a complex with Isa1p and possibly Iba57p; localizes to the mitochondrial intermembrane space, overexpression of ISA2 suppresses grx5 mutations
MDV1	Mitochondria. Peripheral protein of cytosolic face of mitochondrial outer membrane; required for mitochondrial fission
MNN2	Cytoplasm (Golgi apparatus) Alpha-1,2-mannosyltransferase; responsible for addition of the first alpha-1,2-linked mannose to form the branches on the mannan backbone of oligosaccharides, localizes to an early Golgi compartment
MSC7	Cytoplasm (ER) Hypothetical protein; green fluorescent protein (GFP)-fusion protein localizes to the endoplasmic reticulum; msc7 mutants are defective in directing meiotic
MSS116	Mitochondria. Mitochondrial transcription elongation factor; DEAD-box protein; required for efficient splicing of mitochondrial Group I and II introns
MTF2	Mitochondria. Mitochondrial protein that interacts with mitochondrial RNA polymerase; interacts with an N-terminal region of mitochondrial RNA polymerase (Rpo41p) and couples RNA processing and translation to transcription
NCP1	Mitochondria and cytoplasm (ER). NADP-cytochrome P450 reductase; involved in ergosterol biosynthesis
OCH1	Cytoplasm (Golgi apparatus). Mannosyltransferase of the cis-Golgi apparatus; initiates the polymannose outer chain elongation of N-linked oligosaccharides of glycoproteins
OLE1	Cytoplasm (ER). Delta(9) fatty acid desaturase; required for monounsaturated fatty acid synthesis and for normal distribution of mitochondria
ORM2	Cytoplasm (ER). Protein that mediates sphingolipid homeostasis; evolutionarily conserved, required for resistance to agents that induce unfolded protein response; Orm1p and Orm2p together control membrane biogenesis by coordinating lipid homeostasis with protein quality control; protein abundance increases in response to DNA replication stress
PET112	Mitochondria. Subunit of the trimeric GatFAB AmidoTransferase(AdT) complex; involved in the formation of Q-tRNAQ; mutation is functionally complemented by the bacterial GatB ortholog
PET8	Mitochondria. S-adenosylmethionine transporter of the mitochondrial inner membrane; member of the mitochondrial carrier family; required for biotin biosynthesis and respiratory growth
PIM1	Mitochondria. ATP-dependent Lon protease; involved in degradation of misfolded proteins in mitochondria
PSD1	Mitochondria. Phosphatidylserine decarboxylase of the mitochondrial inner membrane; converts phosphatidylserine to phosphatidylethanolamine
PTH2	Mitochondria. One of two mitochondrially-localized peptidyl-tRNA hydrolases; negatively regulates the ubiquitin-proteasome pathway via interactions with ubiquitin-like ubiquitin-associated proteins; dispensable for cell growth; see also PTH1
RAV2	Cytoplasm (endosome). Subunit of RAVE complex (Rav1p, Rav2p, Skp1p); the RAVE complex associates with the V1 domain of the vacuolar membrane (H+)-ATPase (V-ATPase) and promotes assembly and reassembly of the holoenzyme
SCS2	Cytoplasm (ER, Golgi apparatus and vacuoles) Integral ER membrane protein, regulates phospholipid metabolism; one of 6 proteins (Ist2p, Scs2p, Scs22p, Tcb1p, Tcb2p, Tcb3p) that connect ER to the plasma membrane (PM) and regulate PI4P levels by controlling access of Sac1p phosphatase to its substrate PI4P in the PM; interacts with FFAT motif of Opi1p; involved in telomeric silencing; null shows in…
SEC16	Cytoplasm (ER, Golgi apparatus and vacuoles). COPII vesicle coat protein required for ER transport vesicle budding; essential factor in endoplasmic reticulum exit site (ERES) formation, as well as in COPII-mediated ER-to-Golgi traffic; bound to periphery of ER membranes and may act to stabilize initial COPII complexes;
SOM1	Mitochondria. Subunit of the mitochondrial inner membrane peptidase (IMP); IMP is required for maturation of mitochondrial proteins of the intermembrane space
SRP101	Cytoplasm (ER). Signal recognition particle (SRP) receptor alpha subunit; contain GTPase domains; involved in SRP-dependent protein targeting; interacts with the beta subunit, Srp102p
SRP102	Cytoplasm (ER). Signal recognition particle (SRP) receptor alpha subunit; contain GTPase domains; involved in SRP-dependent protein targeting; interacts with the beta subunit, Srp102p
SSH1	Cytoplasm (ER). Subunit of the Ssh1 translocon complex; Sec61p homolog involved in co-translational pathway of protein translocation
SUR4	Cytoplasm (ER). Elongase; involved in fatty acid and sphingolipid biosynthesis; synthesizes very long chain 20-26-carbon fatty acids from C18-CoA primers; involved in regulation of sphingolipid biosynthesis
SUV3	Mitochondria. ATP-dependent RNA helicase; component of the mitochondrial degradosome along with the RNase Dss1p
TCB3	Cytoplasm (ER) and mitochondria. Cortical ER protein involved in ER-plasma membrane tethering; one of 6 proteins (Ist2p, Scs2p, Scs22p, Tcb1p, Tcb2p, Tcb3p) that connect ER to the plasma membrane (PM) and regulate PM phosphatidylinositol-4-phosphate (PI4P) levels by controlling access of Sac1p phosphatase to its substrate PI4P in the PM; localized to the bud via specific mRNA transport; non-tagge…
TDH1	Mitochondria. Glyceraldehyde-3-phosphate dehydrogenase (GAPDH), isozyme 1; involved in glycolysis and gluconeogenesis
TPD3	Cytoplasm. Regulatory subunit A of the heterotrimeric PP2A complex; the heterotrimeric protein phosphatase 2A (PP2A) complex also contains regulatory subunit Cdc55p and either catalytic subunit Pph21p or Pph22p; required for cell morphogenesis and transcription by RNA polymerase III
TYS1	Mitochondria. Cytoplasmic tyrosyl-tRNA synthetase; required for cytoplasmic protein synthesis; interacts with positions 34 and 35 of the tRNATyr anticodon
VMA1	Cytoplasm (plasma membrane and vacuoles) and mitochondria. V-ATPase pump
VMA10	Cytoplasm (plasma membrane and vacuoles) and mitochondria. V-ATPase pump
VMA11	Cytoplasm (plasma membrane and vacuoles) and mitochondria. V-ATPase pump
VMA13	Cytoplasm (plasma membrane and vacuoles) and mitochondria. V-ATPase pump
VMA16	Cytoplasm (plasma membrane and vacuoles) and mitochondria. V-ATPase pump
VMA2	Cytoplasm (plasma membrane and vacuoles) and mitochondria. V-ATPase pump
VMA21	Cytoplasm (plasma membrane and vacuoles) and mitochondria. V-ATPase pump
VMA22	Cytoplasm (plasma membrane and vacuoles) and mitochondria. V-ATPase pump
VMA3	Cytoplasm (plasma membrane and vacuoles) and mitochondria. V-ATPase pump
VMA4	Cytoplasm (plasma membrane and vacuoles) and mitochondria. V-ATPase pump
VMA5	Cytoplasm (plasma membrane and vacuoles) and mitochondria. V-ATPase pump
VMA6	Cytoplasm (plasma membrane and vacuoles) and mitochondria. V-ATPase pump
VMA7	Cytoplasm (plasma membrane and vacuoles) and mitochondria. V-ATPase pump
VMA8	Cytoplasm (plasma membrane and vacuoles) and mitochondria. V-ATPase pump
VPH2	Cytoplasm (plasma membrane and vacuoles) and mitochondria. V-ATPase pump
YOL001W	Nucleus. Cyclin; interacts with cyclin-dependent kinase Pho85p
Community II, B
Loccated in the mitochondria
Respiratory chain complex IV
ATP10	Mitochondria. Assembly factor for the F0 sector of mitochondrial F1F0 ATP synthase
ATP6	Mitochondria. Subunit a of the F0 sector of mitochondrial F1F0 ATP synthase; mitochondrially encoded
ATP9	Mitochondria. F0-ATP synthase subunit c (ATPase-associated proteolipid); encoded on the mitochondrial genome
BCS1	Mitochondria. Mitochondrial protein required for assembly of cytochrome bc1 complex; forms a complex with Cbp6p that binds to mt ribosomes near the polypeptide tunnel exit and promotes efficient translation of the COB mRNA
CBP3	Mitochondria. Mitochondrial protein required for assembly of cytochrome bc1 complex
CBP4	Mitochondria. Mitochondrial protein required for assembly of cytochrome bc1 complex; interacts with the Cbp3p-Cbp6p complex and newly synthesized cytochrome b (Cobp) to promote assembly of Cobp into the cytochrome bc1 complex
CBP6	Mitochondria. Mitochondrial protein required for translation of the COB mRNA; forms a complex with Cbp3p that binds to mt ribosomes near the polypeptide tunnel exit and promotes efficient translation of the COB mRNA; Cbp3p-Cbp6p complex also interacts with newly synthesized cytochrome b (Cobp) and Cbp4p to promote assembly of Cobp into the cytochrome bc1 complex
COA1	Mitochondria. Cytochrome c oxidase assembly factor 1 homolog
COA2	Mitochondria. Cytochrome oxidase assembly factor
COB1	Mitochondria. Mitochondrially encoded subunit of the ubiquinol-cytochrome c reductase complex
COR1	Mitochondria. Core subunit of the ubiquinol-cytochrome c reductase complex; the ubiquinol-cytochrome c reductase complex (bc1 complex) is a component of the mitochondrial inner membrane electron transport chain
COX1	Mitochondria. subunit I of cytochrome c oxidase (Complex IV); Complex IV is the terminal member of the mitochondrial inner membrane electron transport chain; one of three mitochondrially-encoded subunits
COX10	Mitochondria. Subunit VIb of cytochrome c oxidase; cytochrome c oxidase is also known as respiratory Complex IV and is the terminal member of the mitochondrial inner membrane electron transport chain; required for assembly of cytochrome c oxidase but not required for activity after assembly
COX12	Mitochondria. Subunit VIb of cytochrome c oxidase; cytochrome c oxidase is also known as respiratory Complex IV and is the terminal member of the mitochondrial inner membrane electron transport chain; required for assembly of cytochrome c oxidase but not required for activity after assembly
COX14	Mitochondria. Mitochondrial cytochrome c oxidase (complex IV) assembly factor; also involved in translational regulation of Cox1p and prevention of Cox1p aggregation before assembly; associates with complex IV assembly intermediates and complex III/complex IV supercomplexes
COX15	Mitochondria. Protein required for the hydroxylation of heme O to form heme A; heme A is an essential prosthetic group for cytochrome c oxidase
COX16	Mitochondria. Mitochondrial inner membrane protein; required for assembly of cytochrome c oxidase
COX18	Mitochondria. Protein required for membrane insertion of C-terminus of Cox2p; mitochondrial integral inner membrane protein; interacts genetically and physically with Mss2p and Pnt1p
COX2	Mitochondria. Subunit II of cytochrome c oxidase (Complex IV); Complex IV is the terminal member of the mitochondrial inner membrane electron transport chain; one of three mitochondrially-encoded subunits
COX20	Mitochondria. Mitochondrial inner membrane protein; required for proteolytic processing of Cox2p and its assembly into cytochrome c oxidase
COX3	Mitochondria. Subunit III of cytochrome c oxidase (Complex IV); Complex IV is the terminal member of the mitochondrial inner membrane electron transport chain; one of three mitochondrially-encoded subunits
COX5A	Mitochondria. Subunit Va of cytochrome c oxidase; cytochrome c oxidase is the terminal member of the mitochondrial inner membrane electron transport chain; Cox5Ap is predominantly expressed during aerobic growth while its isoform Vb (Cox5Bp) is expressed during anaerobic growth
COX6	Mitochondria. Subunit VI of cytochrome c oxidase (Complex IV); Complex IV is the terminal member of the mitochondrial inner membrane electron transport chain; expression is regulated by oxygen levels
COX7	Mitochondria. Subunit VII of cytochrome c oxidase (Complex IV); Complex IV is the terminal member of the mitochondrial inner membrane electron transport chain
COX9	Mitochondria. Subunit VIIa of cytochrome c oxidase (Complex IV); Complex IV is the terminal member of the mitochondrial inner membrane electron transport chain
CYT1	Mitochondria. Cytochrome c1; component of the mitochondrial respiratory chain; expression is regulated by the heme-activated
CYT2	Mitochondria. Cytochrome c1 heme lyase; involved in maturation of cytochrome c1, which is a subunit of the mitochondrial ubiquinol-cytochrome-c reductase; links heme covalently to apocytochrome c1
ETR1	Mitochondria. Cytochrome c1 heme lyase; involved in maturation of cytochrome c1, which is a subunit of the mitochondrial ubiquinol-cytochrome-c reductase; links heme covalently to apocytochrome c1
FCF1	Mitochondria. Putative PINc domain nuclease; required for early cleavages of 35S pre-rRNA and maturation of 18S rRNA; component of the SSU (small subunit) processome involved in 40S ribosomal subunit biogenesis; copurifies with Faf1p
FCJ1	Mitochondria.
FMP43	Mitochondria. Highly conserved subunit of mitochondrial pyruvate carrier; more highly expressed in glucose-containing minimal medium than in lactate-containing medium; expression regulated by osmotic and alkaline stresses; protein abundance increases in response to DNA replication stress;
LAS21	Cytoplasm (ER). Integral plasma membrane protein; involved in the synthesis of the glycosylphosphatidylinositol (GPI) core structure; mutations affect cell wall integrity
MDJ1	Mitochondria. Co-chaperone that stimulates HSP70 protein Ssc1p ATPase activity; involved in protein folding/refolding in the mitochodrial matrix; required for proteolysis of misfolded proteins
MGR2	Mitochondria. Subunit of the TIM23 translocase complex; acts to couple Tim21p with the core Tim23 translocase; absolutely required for mitochondrial import of presequence-containing proteins at elevated temperature
MRPL33	Mitochondrial large subunit ribosome. Mitochondrial 54S ribosomal protein YmL33
MSS18	Mitochondria. Nuclear encoded protein needed for splicing of mitochondrial intron; required for efficient splicing of mitochondrial COX1 aI5beta intron; mss18 mutations block cleavage of 5' exon - intron junction
MSS2	Mitochondria. Peripherally bound inner membrane protein of the mitochondrial matrix; involved in membrane insertion of C-terminus of Cox2p
MSS51	Mitochondria. Specific translational activator for the mitochondrial COX1 mRNA; loosely associated with the matrix face of the mitochondrial inner membrane; localizes to vacuole membrane in response to H2O2; influences both COX1 mRNA translation and Cox1p assembly into cytochrome c oxidase
NDI1	Mitochondria. Subunit 2 of ubiquinol cytochrome-c reductase (Complex III); Complex III is a component of the mitochondrial inner membrane electron transport chain; phosphorylated
OXA1	Mitochondria. Mitochondrial inner membrane insertase; mediates the insertion of both mitochondrial- and nuclear-encoded proteins from the matrix into the inner membrane; also has a role in insertion of carrier proteins into the inner membrane; acts as a voltage-gated ion channel, activated by substrate peptides
PET100	Mitochondria. Chaperone that facilitates the assembly of cytochrome c oxidase; integral to the mitochondrial inner membrane
PET9	Mitochondria. Major ADP/ATP carrier of the mitochondrial inner membrane; exchanges cytosolic ADP for mitochondrially synthesized ATP; also imports heme and ATP; phosphorylated; required for viability in many lab strains that carry a sal1 mutation
QCR2	Mitochondria. Subunit 2 of ubiquinol cytochrome-c reductase (Complex III); Complex III is a component of the mitochondrial inner membrane electron transport chain; phosphorylated
QCR7	Mitochondria. Subunit 7 of ubiquinol cytochrome-c reductase (Complex III); Complex III is a component of the mitochondrial inner membrane electron transport chain; oriented facing the mitochondrial matrix; N-terminus appears to play a role in complex assembly
QCR8	Mitochondria. Subunit 8 of ubiquinol cytochrome-c reductase (Complex III); Complex III is a component of the mitochondrial inner membrane electron transport chain
QCR9	Mitochondria. Subunit 9 of ubiquinol cytochrome-c reductase (Complex III); Complex III is a component of the mitochondrial inner membrane electron transport chain
RIP1	Mitochondria. Ubiquinol-cytochrome-c reductase; a Rieske iron-sulfur protein of the mitochondrial cytochrome bc1 complex; transfers electrons from ubiquinol to cytochrome c1 during respiration
RRG10	Mitochondria. Mitochondrial protein required for cytochrome c oxidase assembly; also involved in translational regulation of Cox1p and prevention of Cox1p aggregation before assembly; located in the mitochondrial inner membrane
SHY1	Mitochondria. Mitochondrial inner membrane protein required for complex IV assembly; associates with complex IV assembly intermediates and complex III/complex IV supercomplexes
TUF1	Mitochondria. Mitochondrial translation elongation factor Tu
TIM18	Mitochondria. Component of the mitochondrial TIM22 complex; involved in insertion of polytopic proteins into the inner membrane
YHM1	Mitochondria. Mitochondrial GTP/GDP transporter; essential for mitochondrial genome maintenance; has a role in mitochondrial iron transport; member of the mitochondrial carrier family
Community II, C
Loccated mostly in the mitochondria
Transport of phospholipids and protein to the mitochondria
GEM1	Cytoplasme (ER) and mitochondria. Outer mitochondrial membrane GTPase, subunit of the ERMES complex; potential regulatory subunit of the ERMES complex that link smitochondria and the ER
KAP123	Nucleus and cytoplasm. Karyopherin beta; mediates nuclear import of ribosomal proteins prior to assembly into ribosomes and import of histones H3 and H4; localizes to the nuclear pore, nucleus, and cytoplasm; exhibits genetic interactions with RAI1
KGD1	Mitochondria. Subunit of the mitochondrial alpha-ketoglutarate dehydrogenase complex; catalyzes a key step in the tricarboxylic acid (TCA) cycle, the oxidative decarboxylation of alpha-ketoglutarate to form succinyl-CoA
KGD2	Mitochondria. Subunit of the mitochondrial alpha-ketoglutarate dehydrogenase complex; catalyzes a key step in the tricarboxylic acid (TCA) cycle, the oxidative decarboxylation of alpha-ketoglutarate to form succinyl-CoA
LPD1	Mitochondria. Dihydrolipoamide dehydrogenase; the lipoamide dehydrogenase component (E3) of the pyruvate dehydrogenase and 2-oxoglutarate dehydrogenase multi-enzyme complexes
MDM10	Cytoplasme (ER) and mitochondria. Subunit of both the ERMES and the SAM complex; component of ERMES complex which acts as a molecular tether between the mitochondria and the ER
MDM12	Mitochondria. Component of the TOM (Translocase of Outer Membrane) complex; responsible for initial import of mitochondrially directed proteins; mediates interaction between TOM and TIM complexes and acts as a receptor for precursor proteins
MDM34	Mitochondria. Mitochondrial component of the ERMES complex; links the ER to mitochondria and may promote inter-organellar calcium and phospholipid exchange as well as coordinating mitochondrial DNA replication and growth; required for mitophagy
MFB1	Mitochondria. Mitochondria-associated F-box protein; involved in maintenance of normal mitochondrial morphology; interacts with Skp1p through the F-box motif; preferentially localizes to the mother cell during budding
MGM101	Mitochondria Protein with a role in mitochondrial DNA recombinational repair; also involved in interstrand cross-link repair; binds to and catalyzes the annealing of single-stranded mtDNA
MIM1	Mitochondria. Mitochondrial protein required for outer membrane protein import
MIR1	Mitochondria. Mitochondrial phosphate carrier; imports inorganic phosphate into mitochondria; functionally redundant with Pic2p but more abundant than Pic2p under normal conditions
MMM1	Cytoplasme (ER) and mitochondria. ER integral membrane protein, ERMES complex subunit; ERMES links the ER to mitochondria and may promote inter-organellar calcium
PAM18	Mitochondria. Subunit of the import motor (PAM complex)
PMR1	Cytoplasm (Golgi apparatus) High affinity Ca2+/Mn2+ P-type ATPase; required for Ca2+ and Mn2+ transport into Golgi; involved in Ca2+ dependent protein sorting and processing
POR1	Mitochondria. Mitochondrial porin (voltage-dependent anion channel); outer membrane protein required for maintenance of mitochondrial osmotic stability and mitochondrial membrane permeability
RIM1	Mitochondria. ssDNA-binding protein essential for mitochondrial genome maintenance
SAM35	Mitochondria. Component of the sorting and assembly machinery (SAM) complex; the SAM (or TOB) complex is located in the mitochondrial outer membrane; the complex binds precursors of beta-barrel proteins and facilitates their insertion into the outer membrane
SAM50	Mitochondria. Component of the Sorting and Assembly Machinery (SAM) complex
SSA4	Nucleus and cytoplasm. Heat shock protein that is highly induced upon stress
TOM22	Mitochondria. Component of the TOM (Translocase of Outer Membrane) complex; responsible for initial import of mitochondrially directed proteins; mediates interaction between TOM and TIM complexes and acts as a receptor for precursor proteins
TOM37	Mitochondria. Component of the Sorting and Assembly Machinery (SAM) complex
TOM7	Mitochondria. Component of the TOM (translocase of outer membrane) complex; responsible for recognition and initial import steps for all mitochondrially directed proteins; promotes assembly and stability of the TOM complex
TOM70	Mitochondria. Component of the TOM (translocase of outer membrane) complex; involved in the recognition and initial import steps for all mitochondrially directed proteins; acts as a receptor for incoming precursor proteins
UGO1	Mitochondria. Outer membrane component of the mitochondrial fusion machinery
Community II, D
Loccated in the mitochondria
ATP production
ATP1	Mitochondria. Subunit of the mitochondrial F1F0 ATP synthase
ATP11	Mitochondria. Subunit of the mitochondrial F1F0 ATP synthase
ATP12	Mitochondria. Subunit of the mitochondrial F1F0 ATP synthase
ATP14	Mitochondria. Subunit of the mitochondrial F1F0 ATP synthase
ATP15	Mitochondria. Subunit of the mitochondrial F1F0 ATP synthase
ATP17	Mitochondria. Subunit of the mitochondrial F1F0 ATP synthase
ATP18	Mitochondria. Subunit of the mitochondrial F1F0 ATP synthase
ATP18	Mitochondria. Subunit of the mitochondrial F1F0 ATP synthase
ATP2	Mitochondria. Subunit of the mitochondrial F1F0 ATP synthase
ATP3	Mitochondria. Subunit of the mitochondrial F1F0 ATP synthase
ATP4	Mitochondria. Subunit of the mitochondrial F1F0 ATP synthase
ATP5	Mitochondria. Subunit of the mitochondrial F1F0 ATP synthase
ATP7	Mitochondria. Subunit of the mitochondrial F1F0 ATP synthase
ATP8	Mitochondria. Subunit of the mitochondrial F1F0 ATP synthase
FMC1	Mitochondria. Mitochondrial matrix protein; required for assembly or stability at high temperature of the F1 sector of mitochondrial F1F0 ATP synthase
INH1	Mitochondria. Protein that inhibits ATP hydrolysis by the F1F0-ATP synthase
Community II, E
Loccated in the mitochondria
MICOS complex, maintenance of crista junctions
MOS2	Mitochondria. Component of the MICOS complex; MICOS (formerly MINOS or MitOS) is a mitochondrial inner membrane complex that extends into the intermembrane space and has a role in the maintenance of crista junctions
AIM5	Mitochondria. Component of the MICOS complex; MICOS (formerly MINOS or MitOS) is a mitochondrial inner membrane complex that extends into the intermembrane space and has a role in the maintenance of crista junctions
MOS1	Mitochondria. Conserved component of the MICOS complex; MICOS (formerly MINOS or MitOS) is a mitochondrial inner membrane complex that extends into the intermembrane space and has a role in the maintenance of crista junctions
OMS1	Mitochondria. Protein integral to the mitochondrial membrane; has a conserved methyltransferase motif
AIM13	Mitochondria. Component of the MICOS complex; MICOS (formerly MINOS or MitOS) is a mitochondrial inner membrane complex that extends into the intermembrane space and has a role in the maintenance of crista junctions
MOS1	Mitochondria. Conserved component of the MICOS complex; MICOS (formerly MINOS or MitOS) is a mitochondrial inner membrane complex that extends into the intermembrane space and has a role in the maintenance of crista junctions
AIM37	Mitochondria. Component of the MICOS complex; MICOS (formerly MINOS or MitOS) is a mitochondrial inner membrane complex that extends into the intermembrane space and has a role in the maintenance of crista junctions
TUF1	Mitochondria. Component of the MICOS complex; MICOS (formerly MINOS or MitOS) is a mitochondrial inner membrane complex that extends into the intermembrane space and has a role in the maintenance of crista junctions
Community II, F
SCO1	Mitochondria. Cytochrome c complex
COX17	Mitochondria. Cytochrome c complex
Community III
Mostly located in the nucleus
Community III, A
Mixed population
ATG14	Cytoplasm (vacuole) Autophagy-specific subunit of phosphatidylinositol 3-kinase complex I; Atg14p targets complex I to the phagophore assembly site (PAS); required for localizing additional ATG proteins to the PAS; required for overflow degradation of misfolded proteins when ERAD is saturated
BFR2	Nucleus. Component of the SSU and 90S preribosomes; involved in pre-18S rRNA processing; binds to U3 snoRNA and Mpp10p
BRE1	Nucleus. E3 ubiquitin ligase; forms heterodimer with Rad6p to monoubiquinate histone H2B-K123, which is required for the subsequent methylation of histone H3-K4 and H3-K79; required for DSBR, transcription, silencing, and checkpoint control; interacts with RNA-binding protein Npl3p, linking histone ubiquitination to mRNA processing
BUD32	Nucleus and mitochondria. Protein kinase; component of the EKC/KEOPS complex with Kae1p, Cgi121p, Pcc1p, and Gon7p
DIA4	Nucleus and mitochondria. Probable mitochondrial seryl-tRNA synthetase
DID4	Cytoplasm ESCRT-III subunit protein DID4
DOA4	Cytoplasm (vacuole). Ubiquitin hydrolase; deubiquitinates intralumenal vesicle (ILVs) cargo proteins; required for recycling ubiquitin from proteasome-bound ubiquitinated intermediates, acts at the late endosome/prevacuolar compartment to recover ubiquitin from ubiquitinated membrane proteins destined for the vacuole
HDA2	Nucleus. Subunit of the HDA1 histone deacetylase complex; possibly tetrameric trichostatin A-sensitive class II histone deacetylase complex contains Hda1p homodimer and an Hda2p-Hda3p heterodimer; involved in telomere maintenance; relocalizes to the cytosol in response to hypoxia
HEH2	Nucleus. Inner nuclear membrane (INM) protein
IMP2	Mitochondria. Catalytic subunit of mitochondrial inner membrane peptidase complex
MRPL31	Mitochondrial large ribosomal. mitochondrial 54S ribosomal protein YmL31
NIP100	Cytoplasm. Large subunit of the dynactin complex
NUM1	Cytoplasm (ER) and mitochondria. protein required for nuclear migration; component of the mitochondria-ER-cortex-ancorh
PIF1	Nucleus and mitochondria. DNA helicase, potent G-quadruplex DNA binder/unwinder
RRG2	Mitochondria. Mitochondrial 15S rRNA-binding protein; required for intron removal of COB and COX1 pre-mRNAs; has separable roles in stabilizing mitochondrial 15S rRNA and in maturation of the COB and COX1 mRNAs
SHE9	Mitochondria. Protein required for normal mitochondrial morphology
SPC72	Cytoplasm. Component of the cytoplasmic Tub4p (gamma-tubulin) complex
VPS15	Cytoplasm (ER, Golgi apparatus, and endosome) and mitochondria. Serine/threonine protein kinase involved in vacuolar protein sorting; functions as a membrane-associated complex with Vps34p
VPS20	Cytoplasm (vacuole). Myristoylated subunit of the ESCRT-III complex
VPS34	Cytoplasm (vacuole). Phosphatidylinositol (PI) 3-kinase that synthesizes PI-3-phosphate
VPS53	Cytoplasm (Golgi apparatus) Component of the GARP (Golgi-associated retrograde protein) complex
Community III, B
Located mostly in the nucleus
Basic transcription machinery
ALG3	Cytoplasm (ER). dolichyl-P-Man:Man(5)GlcNAc(2)-PP-dolichol alpha-1,3-mannosyltransferase
ATE1	Cytoplasm. Arginyl-tRNA-protein transferase; catalyzes post-translational conjugation of arginine to the amino termini of acceptor proteins which are then subject to degradation via the N-end rule pathway
CDC73	Nucleus. Component of the Paf1p complex; binds to and modulates the activity of RNA polymerases I and II; required for expression of certain genes, modification of some histones, and telomere maintenance
GAL11	Nucelus. Subunit of the RNA polymerase II mediator complex
IRC3	Mitochondria. Double-stranded DNA-dependent helicase of the DExH/D-box family; required for maintenance of the mitochondrial (mt) genome
MAC1	Nucelus. Copper-sensing transcription factor; involved in regulation of genes required for high affinity copper transport; required for regulation of yeast copper genes in response to DNA-damaging agents
PGD1	Nucelus. Subunit of the RNA polymerase II mediator complex
RCS1	Nucelus. Transcription factor involved in iron utilization and homeostasis; binds consensus site PyPuCACCCPu and activates transcription in response to changes in iron availability; in iron-replete conditions localization is regulated by Grx3p, Grx4p, and Fra2p, and promoter binding is negatively regulated via Grx3p-Grx4p binding
ROX3	Nucelus. Subunit of the RNA polymerase II mediator complex; associates with core polymerase subunits to form the RNA polymerase II holoenzyme
RPB9	Nucelus. RNA polymerase II subunit B12.6; contacts DNA; mutations affect transcription start site selection and fidelity of transcription
SKO1	Nucelus. Basic leucine zipper transcription factor of the ATF/CREB family; forms a complex with Tup1p and Cyc8p to both activate and repress transcription
SSN6	Nucelus. General transcriptional co-repressor; acts together with Tup1p; also acts as part of a transcriptional co-activator complex that recruits the SWI/SNF and SAGA complexes to promoters
TOP3	Nucelus. DNA Topoisomerase III; conserved protein that functions in a complex with Sgs1p and Rmi1p to relax single-stranded negatively-supercoiled DNA preferentially
TUB1	Cytoplasm. Alpha-tubulin; associates with beta-tubulin (Tub2p)
Community III, E
Located mostly in the nucleus
Chromatin remodling
APN2	Nucleus. Class II abasic (AP) endonuclease involved in repair of DNA damage
ARP7	Nucleus. Component of both the SWI/SNF and RSC chromatin remodeling complexes; actin-related protein involved in transcriptional regulation
HTL1	Nucleus. Component of the RSC chromatin remodeling complex; found in close proximity to nucleosomal DNA
PET191	Mitochondria. Protein required for assembly of cytochrome c oxidase; exists as an oligomer; described as both an integral mitochondrial inner membrane protein facing the intermembrane space (IMS) and as a soluble IMS protein
RSC4	Nucleus. Component of the RSC chromatin remodeling complex; found in close proximity to nucleosomal DNA
RSC58	Nucleus. Component of the RSC chromatin remodeling complex; found in close proximity to nucleosomal DNA
RSC9	Nucleus. Component of the RSC chromatin remodeling complex; found in close proximity to nucleosomal DNA
SNF2	Nucleus. Catalytic subunit of the SWI/SNF chromatin remodeling complex; involved in transcriptional regulation
SNF5	Nucleus. Catalytic subunit of the SWI/SNF chromatin remodeling complex; involved in transcriptional regulation
SNF6	Nucleus. Catalytic subunit of the SWI/SNF chromatin remodeling complex; involved in transcriptional regulation
SOD2	Mitochondria. Mitochondrial manganese superoxide dismutase
SPO7	Nucleus, cytoplasm (ER), and mitochondria. Putative regulatory subunit of Nem1p-Spo7p phosphatase holoenzym
SWI3	Nucleus. Subunit of the SWI/SNF chromatin remodeling complex; SWI/SNF regulates transcription by remodeling chromosomes
Community III, F
Nuclear and cytoplasmic location
Mostly RNA processing
BEM2	Cytoplasm and mitochondria. Rho GTPase activating protein (RhoGAP); involved in the control of cytoskeleton organization and cellular morphogenesis; required for bud emergence; potential GAP for Rho4p
BUD23	Nucleus and cytoplasm. Methyltransferase; methylates residue G1575 of 18S rRNA; required for rRNA processing and nuclear export of 40S ribosomal subunits independently of methylation activity
CCR4	Nucleus and cytoplasm. CCR4-NOT transcriptional and deadenylase that is involved in mRNA poly(A) tail shortening
CYS4	Cytoplasm and mitochondria. Cystathionine beta-synthase; catalyzes synthesis of cystathionine from serine and homocysteine
GON7	Nucleus. Component of the EKC/KEOPS protein complex
MOT2	Nucleus and cytoplasm. CCR4-NOT transcriptional and deadenylase that is involved in mRNA poly(A) tail shortening
NOP2	Nucleus and cytoplasm. rRNA m5C methyltransferase
NOT5	Nucleus and cytoplasm. CCR4-NOT transcriptional and deadenylase that is involved in mRNA poly(A) tail shortening
POP2	Nucleus and cytoplasm. CCR4-NOT transcriptional and deadenylase that is involved in mRNA poly(A) tail shortening
RLP1B	Cytosolic ribosome large subunit. Ribosomal 60S subunit protein L1B
RPL2B	Cytosolic ribosome large subunit. Ribosomal 60S subunit protein L2B
TRM112	Nucleus and cytoplasm. Protein involved in methylation of tRNA, rRNA, and translation factors
Community III, G
Nuclear
Chromatin remodling
AVL9	Cytoplasm (Golgi apparatus). Conserved protein involved in exocytic transport from the Golgi
DOC1	Nucleus, cytoplasm (Golgi apparatus), and mitochondria. Processivity factor; required for the ubiquitination activity of the anaphase promoting complex (APC)
HAP2	Nucleus. Subunit of the Hap2p/3p/4p/5p CCAAT-binding complex; complex is heme-activated and glucose-repressed
HAP3	Nucleus. Subunit of the Hap2p/3p/4p/5p CCAAT-binding complex; complex is heme-activated and glucose-repressed
HAP4	Nucleus. Transcription factor; subunit of the heme-activated, glucose-repressed Hap2p/3p/4p/5p CCAAT-binding complex
HAP5	Nucleus. Subunit of the Hap2p/3p/4p/5p CCAAT-binding complex; complex is heme-activated and glucose-repressed
Community III, H
DEP1	Nucleus. Component of the Rpd3L histone deacetylase complex
OPI1	Nucleus. Transcriptional regulator of a variety of genes
STB5	Nucleus. Transcription factor
SAP30	Nucleus. Component of Rpd3L histone deacetylase complex
SIN3	Nucleus. Component of both the Rpd3S and Rpd3L histone deacetylase complexes
Community III, I
MBP1	Nucleus. Transcription factor
COX23	Mitochondria. Protein that functions in mitochondrial copper homeostasis
SWI6	Nucleus. Subunit of the SWI/SNF chromatin remodeling complex. SWI/SNF regulates transcription by remodeling chromosomes
Community III, J
TUB4	Cytoplasm. Gamma-tubulin
GIM5	Cytoplasm. Subunit of the heterohexameric cochaperone prefoldin complex
MDM20	Cytoplasm. Non-catalytic subunit of the NatB N-terminal acetyltransferase
Community III, K
ATG20	Cytoplasm. Sorting nexin family member
Yip1	Cytoplasm. Integral membrane protein
Community IV
Mostly located in the mitochondrial ribosome large subunit and matrix
Community IV, A
Mostly located in the mitochondrial ribosome large subunit
Translation of the genes encoded by the mitochondrial genome
IMG2	Mitochondrial ribosome large subunit. Mitochondrial 54S ribosomal protein
MRPL1	Mitochondrial ribosome large subunit. Mitochondrial 54S ribosomal protein
MRPL13	Mitochondrial ribosome large subunit. Mitochondrial 54S ribosomal protein
MRPL15	Mitochondrial ribosome large subunit. Mitochondrial 54S ribosomal protein
MRPL17	Mitochondrial ribosome large subunit. Mitochondrial 54S ribosomal protein
MRPL19	Mitochondrial ribosome large subunit. Mitochondrial 54S ribosomal protein
MRPL20	Mitochondrial ribosome large subunit. Mitochondrial 54S ribosomal protein
MRPL22	Mitochondrial ribosome large subunit. Mitochondrial 54S ribosomal protein
MRPL25	Mitochondrial ribosome large subunit. Mitochondrial 54S ribosomal protein
MRPL28	Mitochondrial ribosome large subunit. Mitochondrial 54S ribosomal protein
MRPL3	Mitochondrial ribosome large subunit. Mitochondrial 54S ribosomal protein
MRPL36	Mitochondrial ribosome large subunit. Mitochondrial 54S ribosomal protein
MRPL40	Mitochondrial ribosome large subunit. Mitochondrial 54S ribosomal protein
MRPL49	Mitochondrial ribosome large subunit. Mitochondrial 54S ribosomal protein
MRPL7	Mitochondrial ribosome large subunit. Mitochondrial 54S ribosomal protein
MRP20	Mitochondrial ribosome large subunit. Mitochondrial 54S ribosomal protein
RPL1B	Mitochondrial ribosome large subunit. Mitochondrial 54S ribosomal protein
MRPL9	Mitochondrial ribosome large subunit. Mitochondrial 54S ribosomal protein
YDR115W	Mitochondrial ribosome large subunit. Mitochondrial 54S ribosomal protein
Community IV, B
Located in the mitochondrial matrix
Transcription of genes encoded by mitochondrial genome
CBP1	Mitochondrial. Mitochondrial protein, regulator of COB mRNA stability and translation
MTF1	Mitochondrial. Mitochondrial RNA polymerase specificity factor
PET111	Mitochondrial. Mitochondrial translational activator specific for the COX2 mRNA
PET127	Mitochondrial. Protein with a role in 5'-end processing of mitochondrial RNAs; located in the mitochondrial membrane
PET309	Mitochondrial. Specific translational activator for the COX1 mRNA; binds to the COX1 mRNA
PET494	Mitochondrial. Mitochondrial translational activator specific for the COX3 mRNA
PET54	Mitochondrial. Mitochondrial inner membrane protein; binds to the 5' UTR of the COX3 mRNA
RPO41	Mitochondrial. Mitochondrial RNA polymerase
SLS1	Mitochondrial. Mitochondrial membrane protein; coordinates expression of mitochondrially-encoded genes
Community IV, C
Mostly located in the mitochondrial ribosome large subunit
Translation of the genes encoded by the mitochondrial genome
AEP1	Mitochondrial. Protein required for expression of the mitochondrial OLI1 gene
ATP25	Mitochondrial. Protein required for the stability of Oli1p (Atp9p) mRNA
IMG1	Mitochondrial ribosome large subunit. Mitochondrial 54S ribosomal protein
MHR1	Mitochondrial. Protein involved in homologous recombination in mitochondria
MRPL51	Mitochondrial ribosome large subunit. Mitochondrial 54S ribosomal protein
MRPL10	Mitochondrial ribosome large subunit. Mitochondrial 54S ribosomal protein
MRPL16	Mitochondrial ribosome large subunit. Mitochondrial 54S ribosomal protein
MRPL22	Mitochondrial ribosome large subunit. Mitochondrial 54S ribosomal protein
MRPL23	Mitochondrial ribosome large subunit. Mitochondrial 54S ribosomal protein
RTC6	Mitochondrial ribosome large subunit. Mitochondrial 54S ribosomal protein
Community IV, D
Mostly located in the mitochondrial ribosome large subunit
Translation of the genes encoded by the mitochondrial genome
MRPL37	Mitochondrial. Protein required for expression of the mitochondrial OLI1 gene
MRPL27	Mitochondrial. Protein required for the stability of Oli1p (Atp9p) mRNA
MRPL32	Mitochondrial ribosome large subunit. Mitochondrial 54S ribosomal protein
MRPL11	Mitochondrial. Protein involved in homologous recombination in mitochondria
MRPL35	Mitochondrial ribosome large subunit. Mitochondrial 54S ribosomal protein
MRPL6	Mitochondrial ribosome large subunit. Mitochondrial 54S ribosomal protein
MRPL4	Mitochondrial ribosome large subunit. Mitochondrial 54S ribosomal protein
MRPL7	Mitochondrial ribosome large subunit. Mitochondrial 54S ribosomal protein
MRPL19	Mitochondrial ribosome large subunit. Mitochondrial 54S ribosomal protein
Community V
Mostly located in the mitochondrial ribosome small subunit
Community V, A
Mostly located in the mitochondrial ribosome small subunit
Translation of the genes encoded by the mitochondrial genome
MRP49	Mitochondrial ribosomal small subunit. Mitochondrial 37S ribosomal protein
MRP2	Mitochondrial ribosomal small subunit. Mitochondrial 37S ribosomal protein
MRPS16	Mitochondrial ribosomal small subunit. Mitochondrial 37S ribosomal protein
MRP7	Mitochondrial ribosomal small subunit. Mitochondrial 37S ribosomal protein
MRPS9	Mitochondrial ribosomal small subunit. Mitochondrial 37S ribosomal protein
MRP21	Mitochondrial ribosomal small subunit. Mitochondrial 37S ribosomal protein
MRP1	Mitochondrial ribosomal small subunit. Mitochondrial 37S ribosomal protein
MRP10	Mitochondrial ribosomal small subunit. Mitochondrial 37S ribosomal protein
MRPS12	Mitochondrial ribosomal small subunit. Mitochondrial 37S ribosomal protein
MRPS17	Mitochondrial ribosomal small subunit. Mitochondrial 37S ribosomal protein
PET123	Mitochondrial ribosomal small subunit. Mitochondrial 37S ribosomal protein
RSM18	Mitochondrial ribosomal small subunit. Mitochondrial 37S ribosomal protein
RSM19	Mitochondrial ribosomal small subunit. Mitochondrial 37S ribosomal protein
RSM24	Mitochondrial ribosomal small subunit. Mitochondrial 37S ribosomal protein
RSM27	Mitochondrial ribosomal small subunit. Mitochondrial 37S ribosomal protein
RSM53	Mitochondrial ribosomal small subunit. Mitochondrial 37S ribosomal protein
RSM7	Mitochondrial ribosomal small subunit. Mitochondrial 37S ribosomal protein
SWS2	Mitochondrial ribosomal small subunit. Mitochondrial 37S ribosomal protein
Community V, B
Mostly located in the mitochondrial ribosome small subunit
Translation of the genes encoded by the mitochondrial genome
MDM38	Mitochondria. Mitochondrial protein; forms a complex with Mba1p to facilitate recruitment of mRNA-specific translational activators to ribosomes
MRPL38	Mitochondrial ribosomal small subunit. Mitochondrial 37S ribosomal protein
MRPL49	Mitochondrial ribosomal small subunit. Mitochondrial 37S ribosomal protein
MRPL8	Mitochondrial ribosomal small subunit. Mitochondrial 37S ribosomal protein
MRPS28	Mitochondrial ribosomal small subunit. Mitochondrial 37S ribosomal protein
MRPS35	Mitochondrial ribosomal small subunit. Mitochondrial 37S ribosomal protein
RSM22	Mitochondrial ribosomal small subunit. Mitochondrial 37S ribosomal protein
PRP31	Mitochondrial ribosomal small subunit. Mitochondrial 37S ribosomal protein
RML2	Mitochondrial ribosomal small subunit. Mitochondrial 37S ribosomal protein
RSM22	Mitochondrial ribosomal small subunit. Mitochondrial 37S ribosomal protein
Community V, C
Mostly located in the mitochondrial ribosome small subunit
Translation of the genes encoded by the mitochondrial genome
RSM23	Mitochondrial ribosomal small subunit. Mitochondrial 37S ribosomal protein
MRP17	Mitochondrial ribosomal small subunit. Mitochondrial 37S ribosomal protein
MRP51	Mitochondrial ribosomal small subunit. Mitochondrial 37S ribosomal protein
MRPS8	Mitochondrial ribosomal small subunit. Mitochondrial 37S ribosomal protein
MVD1	Cytoplasm. Mevalonate pyrophosphate decarboxylase; essential enzyme involved in the biosynthesis of isoprenoids and sterols
Community V, E
MRPS5	Mitochondrial ribosomal small subunit. Mitochondrial 37S ribosomal protein
FYV4	Hypothetical protein
GEP3	Mitochondria. Required for small mitochondrial ribosomal small subunit synthesis
Community V, F
MDM31	Mitochondria. Mitochondrial protein that may have a role in phospholipid metabolism
MDM32	Mitochondria. Mitochondrial protein that may have a role in phospholipid metabolism
Community VI
Located in the mitochondrial and cytoplasm
Respiratory chain complex I, II, and starvation detection by the AMPK complex
CAT5	Mitochondria. Protein required for ubiquinone (Coenzyme Q) biosynthesis
COQ3	Mitochondria. O-methyltransferase; catalyzes two different O-methylation steps in ubiquinone (Coenzyme Q) biosynthesis
COQ4	Mitochondria. Protein with a role in ubiquinone (Coenzyme Q) biosynthesis; possibly functioning in stabilization of Coq7p
COQ5	Mitochondria. 2-hexaprenyl-6-methoxy-1,4-benzoquinone methyltransferase; involved in ubiquinone (Coenzyme Q) biosynthesis
COQ6	Mitochondria. Ubiquinone biosynthesis monooxygenase
COQ9	Mitochondria. Protein required for ubiquinone biosynthesis and respiratory growth
COX11	Mitochondria. Protein required for delivery of copper to Cox1p; mitochondrial inner membrane protein
EM15	Mitochondria. Protein required for flavinylation of Sdh1p; binds to Sdh1p and promotes FAD cofactor attachment, which is necessary for succinate dehydrogenase (SDH) complex assembly and activity
SDH1	Mitochondria. Protein required for flavinylation of Sdh1p; binds to Sdh1p and promotes FAD cofactor attachment, which is necessary for succinate dehydrogenase (SDH) complex assembly and activity
SDH2	Mitochondria. Iron-sulfur protein subunit of succinate dehydrogenase; the complex couples the oxidation of succinate to the transfer of electrons to ubiquinone as part of the TCA cycle and the mitochondrial respiratory chain
SDH4	Mitochondria. Iron-sulfur protein subunit of succinate dehydrogenase; the complex couples the oxidation of succinate to the transfer of electrons to ubiquinone as part of the TCA cycle and the mitochondrial respiratory chain
SIP1	Cytoplasm. Alternate beta-subunit of the Snf1p kinase complex
SIP4	Nucleus. C6 zinc cluster transcriptional activator; binds to the carbon source-responsive element (CSRE) of gluconeogenic genes; involved in the positive regulation of gluconeogenesis; regulated by Snf1p protein kinase
SNF1	Nucleus and cytoplasm. AMP-activated serine/threonine protein kinase; found in a complex containing Snf4p and members of the Sip1p/Sip2p/Gal83p family; required for transcription of glucose-repressed genes, thermotolerance, sporulation, and peroxisome biogenesis
SNF4	Nucleus and cytoplasm. Activating gamma subunit of the AMP-activated Snf1p kinase complex
TVP18	Cytoplasm (Golgi apparatus and vacuoles). Integral membrane protein; localized to late Golgi vesicles along with the v-SNARE
YFH1	Mitochondria. Mitochondrial matrix iron chaperone; oxidizes and stores iron
COQ10	Mitochondria. O-methyltransferase; catalyzes two different O-methylation steps in ubiquinone (Coenzyme Q) biosynthesis
Community VII
Located in the cytoplasm (ER) and mitochondria
Signal recognition particle that import proteins to the mitochondria
LIP5	Mitochondria. Protein involved in biosynthesis of the coenzyme lipoic acid
SEC63	Cytoplasm (ER) and mitochondria. Forms a channel competent for SRP-dependent and post-translational SRP-independent protein targeting and import into the ER
SEC65	Cytoplasm (ER) and mitochondria. Subunit of the signal recognition particle (SRP)
SRP14	Cytoplasm (ER) and mitochondria. Subunit of the signal recognition particle (SRP)
SRP21	Cytoplasm (ER) and mitochondria. Subunit of the signal recognition particle (SRP)
SRP68	Cytoplasm (ER) and mitochondria. Subunit of the signal recognition particle (SRP)
SRP72	Cytoplasm (ER) and mitochondria. Subunit of the signal recognition particle (SRP)
Community VIII
Located in the cytoplasm (ER) and mitochondria
Signal recognition particle that import proteins to the mitochondria
SEC63	Cytoplasm (ER) and mitochondria. Forms a channel competent for SRP-dependent and post-translational SRP-independent protein targeting and import into the ER
SEC65	Cytoplasm (ER) and mitochondria. Subunit of the signal recognition particle (SRP)
SRP14	Cytoplasm (ER) and mitochondria. Subunit of the signal recognition particle (SRP)
SRP21	Cytoplasm (ER) and mitochondria. Subunit of the signal recognition particle (SRP)
SRP68	Cytoplasm (ER) and mitochondria. Subunit of the signal recognition particle (SRP)
SRP72	Cytoplasm (ER) and mitochondria. Subunit of the signal recognition particle (SRP)
Community IIV
Located in the cytoplasm (vacuoles) and mitochondria
CORVET tetherining complex and m-AAA protease component
VPS33	Cytoplasm (vacuoles). Component of CORVET membrane tethering complex
AFG3	Mitochondria. Mitochondrial inner membrane m-AAA protease component
FMP24	Mitochondria. Mitochondrial inner membrane m-AAA protease component
MGR1	Mitochondria. Mitochondrial inner membrane m-AAA protease component
PEP3	Cytoplasm (vacuoles). Component of CORVET membrane tethering complex
PEP5	Cytoplasm (vacuoles). Component of CORVET membrane tethering complex
VAM6	Cytoplasm (vacuoles). Component of CORVET membrane tethering complex
VPS3	Cytoplasm (vacuoles). Component of CORVET membrane tethering complex
YME1	Mitochondria. Mitochondrial inner membrane m-AAA protease component
YTA12	Mitochondria. Mitochondrial inner membrane m-AAA protease component
Community IX
Mixed population
REF2	Nucleus. RNA-binding protein; involved in the cleavage step of mRNA 3'-end formation prior to polyadenylation
RTC1	Cytoplasm (vacuoles). Subunit of the SEA (Seh1-associated) complex; SEA is a coatomer-related complex that associates dynamically with the vacuole
SEC13	Cytoplasm (vacuoles). Structural component of 3 distinct complexes; subunit of Nup84 nuclear pore sub-complex
SEC26	Cytoplasm (ER and vacuoles). Essential beta-coat protein of the COPI coatomer
YTH1	Nucleus and cytoplasm. Essential RNA-binding component of cleavage and polyadenylation factor
RRG7	Hypothetical protein
Community X
Located in the mitochondria
Mitochondria morphology
PET130	Mitochondria. Protein required for respiratory growth
RRG1	Mitochondria. Hypothetical protein; required for vacuolar acidification and mitochondrial genome maintenance
RRG4	Hypothetical protein
RRG5	Mitochondria. Hypothetical protein; required for mitochondrial genome maintenance
RRG8	hypothetical protein; required for mitochondrial genome maintenance
RRG7	Hypothetical protein
Community XI
Located in the mitochondria
Mitochondria morphology
FZO1	Mitochondria. Mitofusin; integral membrane protein involved in mitochondrial outer membrane tethering and fusion
MDM30	Mitochondria. F-box component of an SCF ubiquitin protein ligase complex; associates with and is required for Fzo1p ubiquitination and for mitochondria fusion
MGM1	Mitochondria. Mitochondrial GTPase, present in complex with Ugo1p and Fzo1p; required for mitochondrial morphology
PCP1	Mitochondria. Mitochondrial serine protease; required for the processing of various mitochondrial proteins and maintenance of mitochondrial DNA and morphology
Topological parameters of the network
	Cg	M	L
Mean	0.331921+/ -0.0000055	0.582172 +/- 0.0000775287	3.62575
P value against ER model	0.00890+/-0.0000016	0.362554+/-0.000014
P value against randomized yeast genome
Topological parameters of the ER model
	Cg	M	L
Mean	0.0896+/-0.0012	0.36244+/-0.00404	3.07195+/-0.02190
Proteins that are not a part of the network
ADD37	Cytoplasm (ER). Hypothetical protein; involved in ER-associated protein degradation
AEP3	Mitochondria. Peripheral mitochondrial inner membrane protein; may facilitate use of unformylated tRNA-Met in mitochondrial translation initiation.
AIM26	Mitochondria. Hypothetical protein; null mutant is viable and displays elevated frequency of mitochondrial genome loss
AIM33	Hypothetical protein, highly conserved across species
ARG82	Nucleus. Inositol polyphosphate multikinase (IPMK)
ARO2	Cytoplasm. Bifunctional chorismate synthase and flavin reductase
ASI2	Nucleus. Subunit of the nuclear inner membrane Asi ubiquitin ligase complex
ATG15	Mitochondria. Specific translational activator for the mitochondrial ATP6 mRNA
ATP22	Mitochondria. Specific translational activator for the mitochondrial ATP6 mRNA
ATP23	Mitochondria. Putative metalloprotease of the mitochondrial inner membrane
BUD25	Protein involved in bud-site selection
CAF17	Mitochondria. Protein involved in incorporating iron-sulfur clusters into proteins
CAT8	Nucleus. Zinc cluster transcriptional activator
CBS2	Mitochondria. Mitochondrial translational activator of the COB mRNA
CBT1	Mitochondria. Protein involved in 5' RNA end processing; substrates include mitochondrial COB, 15S rRNA, and RPM1 transcripts
CMC1	Mitochondria. Copper-binding protein of the mitochondrial intermembrane space
COQ1	Mitochondria. Hexaprenyl pyrophosphate synthetase
COQ10	Mitochondria. Coenzyme Q (ubiquinone) binding protein; functions in the delivery of Q6 to its proper location for electron transport during respiration
CST6	Nucleus. Basic leucine zipper (bZIP) transcription factor, in ATF/CREB family
CST9	Nucleus. SUMO E3 ligase; required for synaptonemal complex formation
CWH8	Cytoplasm (ER). Dolichyl pyrophosphate (Dol-P-P) phosphatase
CYC3	Mitochondria. Cytochrome c heme lyase (holocytochrome c synthase)
DSL1	Mitochondria. Peripheral membrane protein needed for Golgi-to-ER retrograde traffic
DSS1	Mitochondria. 3'-5' exoribonuclease; component of the mitochondrial degradosome along with the ATP-dependent RNA helicase Suv3p
EMI1	Mitochondria. Non-essential hypothetical protein
EOS1	Cytoplasm (ER). Protein involved in N-glycosylation; deletion mutation confers sensitivity to exidative stress and shows synthetic lethality with mutations in the spindle checkpoint genes BUB3 and MAD1
Erg10	Nucleus and cytoplasm. Acetyl-CoA C-acetyltransferase (acetoacetyl-CoA thiolase); cytosolic enzyme that transfers an acetyl group from one acetyl-CoA molecule to another, forming acetoacetyl-CoA
Erg12	Nucleus and cytoplasm. Mevalonate kinase; acts in the biosynthesis of isoprenoids and sterols
Erg8	Nucleus and cytoplasm. Phosphomevalonate kinase
ERV1	Cytoplasm. Flavin-linked sulfhydryl oxidase of the mitochondrial IMS
EUG1	Cytoplasm (ER). Protein disulfide isomerase of the endoplasmic reticulum lumen
FRA2	Cytoplasm. Protein involved in negative regulation of iron regulation transcription
FUM1	Mitochondria. Fumarase; converts fumaric acid to L-malic acid in the TCA cycle
GRX5	Mitochondria. Glutathione-dependent oxidoreductase
GSH1	Cytoplasm. Gamma glutamylcysteine synthetase
HEM14	Mitochondria. Protoporphyrinogen oxidase; a mitochondrial enzyme that catalyzes the seventh step in the heme biosynthetic pathway
HTD2	Mitochondria. Mitochondrial 3-hydroxyacyl-thioester dehydratase
HUR1	Cytoplasm. Hypothetical protein; reported null mutant phenotype of hydroxyurea sensitivity
IFM1	Mitochondria. Mitochondrial translation initiation factor 2
ISA2	Mitochondria. Protein required for maturation of mitochondrial [4Fe-4S] proteins
KNH1	Cell wall. Protein with similarity to Kre9p; Kre9p is involved in cell wall beta
LIP2	Mitochondria. Lipoyl ligase; involved in the modification of mitochondrial enzymes by the attachment of lipoic acid groups
LPE10	Mitochondria. Mitochondrial inner membrane magnesium transporter; involved in maintenance of mitochondrial magnesium concentrations and membrane potential
MAK32	Protein necessary for stability of L-A dsRNA-containing particles
MCT1	Mitochondria. Predicted malonyl-CoA:ACP transferase; putative component of a type-II mitochondrial fatty acid synthase that produces intermediates for phospholipid remodeling
MDM35	Mitochondria. Mitochondrial intermembrane space protein
MEF1	Mitochondria. Mitochondrial elongation factor involved in translational elongation
MET7	Mitochondria. Polylpolyglutamate synthetase; catalyzes extension of the glutamate chains of the folate coenzymes
MLS1	Mitochondria. Malate synthase, enzyme of the glyoxylate cycle
MNE1	Mitochondria. Protein involved in splicing Group I aI5-beta intron from COX1 mRNA
MON2	Cytoplasm (ER, Golgi apparatus, and vacuole). Protein with a role in endocytosis and vacuole integrity
MRF1	Mitochondria. Mitochondrial translation release factor; involved in stop codon recognition and hydrolysis of the peptidyl-tRNA bond during mitochondrial translation
MRS1	Mitochondria. Splicing protein; required for splicing of two mitochondrial group I introns (BI3 in COB and AI5beta in COX1)
MSD1	Mitochondria. Mitochondrial aspartyl-tRNA synthetase
MSE1	Mitochondria. Mitochondrial glutamyl-tRNA synthetase; predicted to be palmitoylated
MSF1	Mitochondria. Mitochondrial phenylalanyl-tRNA synthetase
MSM1	Mitochondria. Mitochondrial methionyl-tRNA synthetase (MetRS)
MSR1	Mitochondria. Mitochondrial arginyl-tRNA synthetase
MSW1	Mitochondria. Mitochondrial tryptophanyl-tRNA synthetase
MSY1	Mitochondria. Mitochondrial tyrosyl-tRNA synthetase
MTG1	Mitochondria. Mitochondrial ribosome-associated GTPase 1
MXR2	Mitochondria. Methionine-R-sulfoxide reductase; involved in the response to oxidative stress
NAM2	Mitochondria. Mitochondrial leucyl-tRNA synthetase
NUP170	Nucleus. Subunit of the inner ring of the nuclear pore complex (NPC)
OAR1	Mitochondria. Mitochondrial 3-oxoacyl-[acyl-carrier-protein] reductase
OCT1	Mitochondria. Mitochondrial intermediate peptidase
PDE2	Nucleus and cytoplasm. High-affinity cyclic AMP phosphodiesterase
PDX3	Mitochondria. Pyridoxine (pyridoxamine) phosphate oxidase
PET18	Cytoplasm. Hypothetical protein; has weak similarity to proteins involved in thiamin metabolism
POS5	Cytoplasm. Hypothetical protein; has weak similarity to proteins involved in thiamin metabolism
PPT2	Cytoplasm. Phosphopantetheine:protein transferase (PPTase); activates mitochondrial acyl carrier protein
PRM7	Plasma membrane. Pheromone-regulated protein; predicted to have one transmembrane segment
QRI5	Mitochondria. Mitochondrial inner membrane protein; required for accumulation of spliced COX1 mRNA
QRI7	Mitochondria. Protein involved in threonylcarbamoyl adenosine biosynthesis; Sua5p and Qri7p are necessary and sufficient for RNA t6A modification in vitro
RDI1	Cytoplasm. Rho GDP dissociation inhibitor; involved in the localization and regulation of Cdc42p and Rho1p
RIB4	Cytoplasm and mitochondria. Lumazine synthase (DMRL synthase)
RIM2	Mitochondria. Mitochondrial pyrimidine nucleotide transporter
RIM9	Plasma membrane. Plasma membrane hypothetical protein; involved in the proteolytic activation of Rim101p in response to alkaline pH
RMD9	Mitochondria. Mitochondrial protein required for respiratory growth; mutant phenotype and genetic interactions suggest a role in delivering mt mRNAs to ribosomes
RNR1	Nucleus and cytoplasm. Major isoform of large subunit of ribonucleotide-diphosphate reductase
RPE1	Cytoplasm. D-ribulose-5-phosphate 3-epimerase
RPH1	Nucleus. JmjC domain-containing histone demethylase
RRF1	Mitochondria. Mitochondrial ribosome recycling factor
RRG3	Mitochondria. Putative lipoate-protein ligase
RRG7	Mitochondria. Hypothetical protein; green fluorescent protein (GFP)-fusion protein localizes to the mitochondrion
SAG1	Cell wall. Alpha-agglutinin of alpha-cells; binds to Aga1p during agglutination
SEC53	Cytoplasm. Phosphomannomutase; involved in synthesis of GDP-mannose and dolichol-phosphate-mannose
SHE1	Nucleus and cytoplasm. Mitotic spindle protein; interacts with components of the Dam1 (DASH) complex, its effector Sli15p, and microtubule-associated protein Bim1p
SHU2	Nucleus. Component of Shu complex (aka PCSS complex); Shu complex also includes Psy3, Csm2, Shu1, and promotes error-free DNA repair
SLM3	Mitochondria. tRNA-specific 2-thiouridylase
SOM1	Mitochondria. Subunit of the mitochondrial inner membrane peptidase (IMP); IMP is required for maturation of mitochondrial proteins of the intermembrane space
SOV1	Mitochondria. Hypothetical protein
SPO22	Nucleus. Meiosis-specific protein essential for chromosome synapsis
SPT10	Nucleus. Putative histone acetylase with a role in transcriptional silencing
TPS2	Cytoplasm and mitochondria. Phosphatase subunit of the trehalose-6-P synthase/phosphatase complex
TRS20	Cytoplasm (Golgi apparatus and vacuole). Core component of transport protein particle (TRAPP) complexes I-III; TRAPP complexes are related multimeric guanine nucleotide-exchange factors for the GTPase Ypt1p, regulating ER-Golgi traffic (TRAPPI), intra-Golgi traffic (TRAPPII), endosome-Golgi traffic (TRAPPII and III) and autophagy
UBA3	Cytoplasm. Protein that activates Rub1p (NEDD8) before neddylation
UBX3	Cytoplasm. Subunit of the DSC ubiquitin ligase complex
UBX4	Nucleus and cytoplasm. UBX domain-containing protein that interacts with Cdc48p
UFD1	Cytoplasm (ER). Substrate-recruiting cofactor of the Cdc48p-Npl4p-Ufd1p segregase
URM1	Nucleus and cytoplasm. Ubiquitin-like protein involved in thiolation of cytoplasmic tRNAs
XYL2	Cytoplasm. Xylitol dehydrogenase; converts xylitol to D-xylulose
YBL044W	Hypothetical protein
YCP4	Hypothetical protein
YDL012C	Hypothetical protein
YDL057W	Hypothetical protein
YDL063C	Hypothetical protein
YDL114W	Hypothetical protein
YDL119C	Hypothetical protein
YDL129W	Hypothetical protein
YDL133W	Hypothetical protein
YDL157C,	Hypothetical protein
YDR042C,	Hypothetical protein
YGP1	Hypothetical protein
YGR102C	Hypothetical protein
YIA6	Mitochondria. Mitochondrial NAD+ transporter
YIL060W	Hypothetical protein
YJR120W	Hypothetical protein
YLR149C	Hypothetical protein
YMR084W	Hypothetical protein
YMR244C-A	Hypothetical protein
YOR060C	Hypothetical protein
YPS7	Cytoplasm (ER). Putative GPI-anchored aspartic protease
ZIM17	Mitochondria. Protein co-chaperone with a zinc finger motif

## Sheet: Location
Mitochondria
Mitochondrial ribosome small subunit
Community I	Community II	Community III	Community IV	Community V	Community VI	Community VII	CommunityVIII	Community IX	Community X	Community XI	Community XII
				MRP1
				MRP10
				MRP17
				MRP17
				MRP2
				MRP21
				MRP49
				MRP51
				MRP7
				MRPL38
				MRPL49
				MRPL8
				MRPS12
				MRPS16
				MRPS17
				MRPS28
				MRPS35
				MRPS5
				MRPS8
				MRPS9
				MVD1
				PET123
				PRP31
				RML2
				RSM18
				RSM19
				RSM22
				RSM22
				RSM23
				RSM24
				RSM27
				RSM53
				RSM7
				SWS2
Community distribution P- value	0.000617
Mitochondrial ribosome large subunit
Community I	Community II	Community III	Community IV	Community V	Community VI	Community VII	CommunityVIII	Community IX	Community X	Community XI	Community XII
			ATP25
			AEP1
			IMG1
			IMG2
			MRP20
			MRPL1
			MRPL10
			MRPL11
			MRPL13
			MRPL15
			MRPL16
			MRPL17
			MRPL19
			MRPL20
			MRPL20
			MRPL20
			MRPL22
			MRPL23
			MRPL25
			MRPL27
			MRPL28
			MRPL3
			MRPL32
			MRPL33
			MRPL35
			MRPL36
			MRPL37
			MRPL4
			MRPL40
			MRPL49
			MRPL51
			MRPL6
			MRPL7
			MRPL7
			MRPL9
			PET111
			PET54
			RPL1B
			RPO41
			RTC6
			YDR115W
Community distribution P- value	3.73e-06
Non-roibsomal mitochondria
Community I	Community II	Community III	Community IV	Community V	Community VI	Community VII	CommunityVIII	Community IX	Community X	Community XI	Community XII
ABF2	ADH3	BUD32	MHR1	MDM38	CAT5	AFG3			PET130	FZO1
ACO1	AIM13	DIA4	CBP1	FYV4	COQ3	FMP24			RRG1	MDM30
CEM1	AIM37	PET191	MDM36	GEP3	COQ4	MGR1			RRG4	MGM1
COQ2	AIM5	SOD2	MTF1	MDM31	COQ5	YME1			RRG5	PCP1
COX19	ATP1		PET127	MDM32	COQ6				RRG8
CYR1	ATP10		PET309		COQ9				RRG7
EX05	ATP11		PET494		COX11
HFA1	ATP12		PET54		EM15
HMI1	ATP14		SLS1		SDH1
ISA1	ATP15				SDH2
MGE1	ATP17				SDH4
MIP1	ATP18				YFH1
MSH1	ATP18				COQ10
MTM1	ATP2
PPA2	ATP3
RRG9	ATP4
	ATP5
	ATP6
	ATP7
	ATP8
	ATP9
	BCS1
	CAF17
	CBP3
	CBP4
	CBP6
	CBS1
	COA1
	COA2
	COB1
	COR1
	COX1
	COX10
	COX12
	COX14
	COX15
	COX16
	COX18
	COX2
	COX20
	COX3
	COX5A
	COX6
	COX7
	COX9
	CYT1
	CYT2
	DSS1
	ERG13
	ERG6
	ETR1
	EXO5
	FAS2
	FCF1
	FCJ1
	FIS1
	FMC1
	FMP43
	GCV3
	GEM1
	IMP1
	INH1
	ISA2
	KGD1
	KGD1
	KGD2
	LPD1
	MDJ1
	MDM10
	MDM12
	MDM34
	MDV1
	MFB1
	MGM101
	MGR2
	MIM1
	MIR1
	MMM1
	MOS1
	MOS2
	MSS116
	MSS18
	MSS2
	MSS51
	MTF2
	NCP1
	NDI1
	OMS1
	OXA1
	PAM18
	PET100
	PET112
	PET9
	PIM1
	POR1
	PSD1
	QCR2
	QCR7
	QCR8
	QCR9
	RIM1
	RIP1
	RRG10
	SAM35
	SAM50
	SCO1
	SHY1
	SOM1
	SSA4
	SUV3
	TDH1
	TOM22
	TOM37
	TOM7
	TOM70
	TUF1
	TYS1
	UGO1
	YHM1
	YOL001W
Community distribution P- value	1.54e-11
Nucleus
Community I	Community II	Community III	Community IV	Community V	Community VI	Community VII	CommunityVIII	Community IX	Community X	Community XI	Community XII
ADA2	KAP123	BFR2						REF2
ADK1		APN2						YTH1
ADR1		ARP7
APN1		AVL9
BUB1		BRE1
GCN5		BUD23
HEK2		BUD32
HFI1		CDC73
HHF1		DEP1
		DID4
HOT1		DOC1
HTB2		GAL11
IES6		GON7
ILV5		HAP2
MIG3		HAP3
MIP1		HAP4
MMS22		HAP5
MOT1		HDA2
MOT3		HEH2
MSN2		HTL1
NFU1		IMP2
NGG1		IRC3
PHO80		MAC1
PHO85		MBP1
PSY4		MOT2
RDR1		NOP2
RTF1		NOT5
SGF29		OPI1
SOD1		PGD1
SOK1		PIF1
SPT20		RCS1
SPT3		ROX3
SRB2		RPB9
SRB6		RSC4
VID31		RSC58
WHI2		RSC9
HMI1		SAP30
SDA1		SIN3
SSQ1		SKO1
		SNF2
		SNF5
		SNF6
		SPO7
		SSN6
		STB5
		SWI3
		SWI6
		TOP3
Community distribution P- value	9.93e-18
Cytoplasm
Community I	Community II	Community III	Community IV	Community V	Community VI	Community VII	CommunityVIII	Community IX	Community X	Community XI	Community XII
ACF2	CSG2	ALG3	MDM31		TVP18	LIP5	PEP3			RTC1
ACT1	DRS2	ATE1	MDM32		SIP1	SEC63	PEP5			SEC13
AEP2	ERG1	ATG14			SIP4	SEC65	VAM6			SEC26
AIM10	ERG24	ATG20			SNF1	SRP14	VPS3
ARC15	ERG25	BEM2			SNF4	SRP21
ARC35	ERG26	CCR4				SRP68
ARC40	ERG27	CYS4				SRP72
ARF1	ERG28	DOA4				VPS33
ARP2	ERG3	MDM20
ARP8	ERG5	MOT2
ATG1	ERG7	NOT5
ATG10	GEM1	NUM1
ATG11	GET1	POP2
ATG12	HMG1	RLP1B
ATG13	LAS21	RPL2B
ATG16	MNN2	SPC72
ATG17	MSC7	SPO7
ATG18	OCH1	TRM112
ATG2	OLE1	TUB1
ATG23	ORM2	TUB4
ATG27	PMR1	VPS15
ATG3	SCS2	VPS20
ATG32	SEC16	VPS34
ATG33	SRP101	VPS53
ATG34	SRP102	Yip1
ATG4	SSH1	GIM5
ATG5	SUR4
ATG7	TCB3
ATG8	VMA1
ATG9	VMA10
BCK1	VMA11
BOI2	VMA13
BUD16	VMA16
BUG1	VMA2
BUL1	VMA21
CBP2	VMA22
CCT6	VMA3
CDC34	VMA4
CDC40	VMA5
CDC53	VMA6
CHC1	VMA7
CIN4	VMA8
CLC1	RAV2
CLU1	FET3
CNM67
COA4
COF1
CCT4
CTK3
CTR1
CYK3
CYS3
DCS1
DHH1
DNM1
DSL1
EGD1
ELP3
END3
ENT5
FAB1
FAS1
FBP1
GCN2
GDH1
GEF1
GIN4
GLO3
GRR1
GVP36
HFM1
HOG1
HOM6
HSP31
IQG1
IRA2
ISN1
KCS1
LAS17
LCB5
LSM1
LSM1
LSM6
LUV1
MDM1
MEF2
MKK2
MLC1
MSK1
MSS4
MTH1
MYO1
MYO2
NUP170
OSS1
PAB1
PAN1
PBS2
PEP12
PEP7
PET56
PFY1
PKH1
PKH2
PPA1
PRE1
PRE3
PRE5
PRE6
PRE6
PSY4
PTC1
PTP3
RAD6
RAI1
RET2
RGA1
RNR4
RPL21A
RPN8
RPS11A
RPT2
RPT4
RRG6
RVS161
RVS167
SAC1
SAC6
SEC10
SEC14
SEC15
SEC16
SEC17
SEC18
SEC2
Sec20
SEC21
SEC27
SEC3
SEC4
SEC5
SEC8
SED5
SHO1
SHP1
SIT4
SKI3
SLA1
SLY1
SNF7
SNX4
SRV2
SSD1
STE11
STE20
STE50
STP2
TCO89
TEF4
THR1
THR4
TPM1
TRS20
TRS20
TUB1
TUB1
UBA1
Ubc4
UBP14
UFO1
USE1
VPS1
VPS13
VPS16
VPS45
VPS51
VRP1
HRR25
SPS1
WHI2
XRN1
YCL001W
YDJ1
YHL008C
YHR009C
Community distribution P- value	7.34e-09

## Sheet: Phenotypical output
Lack of voltage across the mitochondria membranes
	Test sub-network	Randomize sampled sub-network	ER model
Cg	0.692857+/-0.000114	0.29721+/- 0.0361894	0.0245058+/- 0.00040
P- value		<0.0001	<0.0001
M	0.669822+/-0.0001506	0.764574+/-0.0048387	0.65857+/-0.000066
P- value		<0.0001	<0.0001
Community I	Community II	Community III	Community IV	Community V	Community VI	Community VII	CommunityVIII	Community IX	Community X	Community XI	Community XII
AEP2	ATP11	DIA4	AEP1	GEP3
CIN4	ATP12	MAC1	ATP25	MRP17
CYR1	ATP14	MBP1	IMG1	MRP51
EX05	ATP15	MRPL31	MHR1	MRPL8
KCS1	ATP17	RPL2B	MRPL51	MRPS17
MSH1	ATP2	SOD2	MRPL10	MRPS28
PPA2	ATP4		MRPL16	RML2
SLM5	ATP5		MRPL22	RSM18
	ATP7		MRPL23	RSM7
	CYT1		MRPL7	SWS2
	FMC1		MRPL9
	MGM101		MTF1
	POR1		RPO41
	SCS2		SLS1
	TUF1		MRPL49
	VMA1
	VMA11
	VMA22
	VMA4
	VMA8
	VPH2
Defect in mitochondria inheritance
	Test sub-network	Randomize sampled sub-network	ER model
Cg	0.58359+/-0.000027	0.010499+/-0.000013	0.326893+/- 0.00474
P- value		<0.0001	<0.0001
M	0.746528+/-0.0000104	0.53614+/-0.00006	0.696288 +/- 0.000877
P- value		<0.0001	<0.0001
Community I	Community II	Community III	Community IV	Community V	Community VI	Community VII	CommunityVIII	Community IX	Community X	Community XI	Community XII
ABF2	ATP1	ALG3	AEP1	MRP1	YFH1	MGR1	SRP21		RRG1	FZO1
ACF2	ATP11	APN2	ATP25	MRP10	COQ4	AFG3			RRG8	MDM30
ACO1	ATP12	ATE1	CBP1	MRP17	COQ9				RRG7	MGM1
ACT1	ATP15	ATG14	IMG1	MRP21	COQ5					PCP1
ADA2	ATP17	BEM2	IMG2	MRPL38	COQ10
ADR1	ATP2	BUD32	MHR1	MRPL8	COQ3
AEP2	ATP3	CYS4	MRPL1	MRPS17	COX11
AIM10	ATP4	DIA4	MRPL13	MRPS28
APN1	ATP5	DOC1	MRPL15	MRPS8
ARC15	ATP7	GAL11	MRPL17	PET123
ARF1	BCS1	HAP2	MRPL19	RML2
ARC15	CBP3	HAP3	MRPL20	RSM18
ATG10	COA1	HAP5	MRPL22	RSM19
ATG34	COA2	HTL1	MRPL25	RSM22
BOI2	COR1	MAC1	MRPL28	RSM22
BUG1	COX1	ROX3	MRPL36	RSM23
BUL1	COX12	RPB9	MRPL40	RSM24
CBP2	COX18	SNF5	MRPL6	RSM27
CDC40	COX5A	SPO7	MRPL7	RSM53
CEM1	COX6	SWI3	MRPL9	RSM7
CHC1	COX7	VPS15		SWS2
CLC1	COX9	VPS20	MTF1
COQ2	CYT1		PET111
COX19	DRS2		PET127
DCS1	ERG5		PET309
GDH1	ETR1		PET494
GEF1	FMC1		PET54
GVP36	FMP43		RPO41
HFI1	FTR1		SLS1
HFM1	KGD1		YDR115W
HMI1	MDJ1		MRPL32
HOM6	MDM10
ILV5	MDM12
IRA2	MGM101
ISA1	MGR2
ISN1	MIR1
LCB5	MMM1
LSM1	MRPL33
MDM1	MSC7
MEF2	MSS2
MIP1	MSS51
MOT3	OLE1
MSH1	OXA1
MSK1	PET100
MTG2	PTH2
NFU1	QCR2
PEP12	QCR7
PHO80	RIM1
PPA2	RIM1
PSY4	RIP1
PTC1	SHY1
RDR1	SSH1
RGA1	TOM70
RNR4	TUF1
RPS11A	VMA1
RPS26B	VMA11
RRG9	VMA13
RTF1	VMA16
RVS161	VMA2
SGF29	VMA21
SLM5	VMA22
SPS1	VMA4
SRV2	VMA5
SSQ1	VMA6
STE11	VMA7
STE50	VMA8
STP2	VPH2
THR1	VMA3
TPM1
Ubc4
UBP14
VRP1
WHI2
YBL036C
YCL001WA
YHL008C
YHR009C
YLR125W
Defect in mitophagy
	Test sub-network	Randomize sampled sub-network	ER model
Cg	0.551275+/-0.00064	0.274251+/- 0.0630795	0.045759 +/- 0.00057
P- value		<0.0001	<0.0001
M	0.54944+/-0.00033	0.730452 +/- 0.00787713	0.7526355 +/- 0.000574
P- value		<0.0001	<0.0001
Community I	Community II	Community III	Community IV
ATG1	FCJ1	VPS15
ATG10	FMC1	VPS34
ATG11	PMR1
ATG12
ATG13
ATG16
ATG17
ATG18
ATG2
ATG23
ATG27
ATG3
ATG32
ATG34
ATG4
ATG5
ATG7
ATG8
ATG9
BCK1
BUB1
DNM1
PEP12
Defect in mitochondria morphology
	Test sub-network	Randomize sampled sub-network	ER model
Cg	0.416397+/-0.00003	0.333693+/-0.0209241	0.02713+/- 0.50804
P- value		<0.0001	<0.0001
M	0.706813+/-0.00026	0.773652+/-0.00319342	0.50804+/- 0.000205
P- value		<0.0001	<0.0001
Community I	Community II	Community III	Community IV	Community V	Community VI	Community VII	CommunityVIII	Community IX	Community X	Community XI	Community XII
ACT1	AIM13	BFR2	MHR1						PET130	FZO1
ARC15	AIM37	CCR4	RPO41						RRG1	MDM30
ARC35	AIM5	CDC73							RRG4	MGM1
ARC40	ERG25	DIA4							RRG5	PCP1
ARP2	ERG26	NUM1							RRG8
CCT4	ERG27	POP2							RRG7
CCT6	ERG28	SHE9
CDC34	FCF1
CDC53	FCJ1
CLU1	GET1
COF1	MDM10
DNM1	MDM12
IQG1	MDM34
KCS1	MFB1
LAS17	MGM101
MDM36	MIM1
MLC1	MMM1
MSS4	PAM18
MYO1	POR1
MYO2	SAM35
PAN1	SAM50
PFY1	SRP101
PGA2	SRP102
PRE1	TOM22
PRE3	TOM7
PRE5	UGO1
PRE6
PRE6
RET2
RPN8
RPT2
RPT4
SDA1
SEC8
SEC10
SEC15
SEC3
SEC5
SEC14
SEC17
SEC21
SEC27
SEC4
SED5
SLY1
SSQ1
UBA1
VPS45
